# Supplementary material for: Fluorinated β-diketonate complexes M(tfac)2(TMEDA) (M = Fe, Ni, Cu, Zn) as precursors for the MOCVD growth of metal and metal oxide thin films
Source: Royal Society of Chemistry journal article supplement (doi:10.1039/d2ra01338j), 2022-01-01
Supplement: d2ra01338j1.pdf [file d2ra01338j1.pdf]

## Content

**Fig. S1:**  $^1\text{H-NMR}$  of the black residue after heating **3** at 120 °C for 3 h under inert conditions at atmospheric pressure.

**Fig. S2:** ATR-IR spectrum of  $\text{Fe}(\text{acac})_2(\text{TMEDA})$ .

**Fig. S3:** ATR-IR spectrum of  $\text{Fe}(\text{tfac})_2(\text{TMEDA})$  **1**.

**Fig. S4:** ATR-IR spectrum of  $\text{Fe}(\text{hfac})_2(\text{TMEDA})$ .

**Fig. S5:** ATR-IR spectrum of  $\text{Ni}(\text{acac})_2(\text{TMEDA})$ .

**Fig. S6:** ATR-IR spectrum of  $\text{Ni}(\text{tfac})_2(\text{TMEDA})$  **2**.

**Fig. S7:** ATR-IR spectrum of  $\text{Ni}(\text{hfac})_2(\text{TMEDA})$ .

**Fig. S8:** ATR-IR spectrum of  $\text{Cu}(\text{tfac})_2(\text{TMEDA})$  **3**.

**Fig. S9:** ATR-IR spectrum of  $\text{Cu}(\text{hfac})_2(\text{TMEDA})$ .

**Fig. S10:** ATR-IR spectrum of  $\text{Zn}(\text{acac})_2(\text{TMEDA})$ .

**Fig. S11:** ATR-IR spectrum of  $\text{Zn}(\text{tfac})_2(\text{TMEDA})$  **4**.

**Fig. S12:** ATR-IR spectrum of  $\text{Zn}(\text{hfac})_2(\text{TMEDA})$ .

**Fig. S13:** Isothermal TGA curves (125 °C) for  $\text{M}(\text{acac})_2$ ,  $\text{M}(\text{acac})_2(\text{TMEDA})$ ,  $\text{M}(\text{tfac})_2(\text{TMEDA})$  and  $\text{M}(\text{hfac})_2(\text{TMEDA})$  ( $\text{M} = \text{Fe}$  (a),  $\text{Ni}$  (b),  $\text{Cu}$  (c) and  $\text{Zn}$  (d)).

**Fig. S14:** XRD of **1**.

**Fig. S15:** XRD of **2**.

**Fig. S16:** XRD of **3**.

**Fig. S17:** XRD of **4**.

**Fig. S18:** 3D model of the MOCVD reactor.

**Fig. S19:** SEM of **1\_Si** at 300 °C (a), 400 °C (b) and 500 °C (c).

**Fig. S20:** SEM of **1\_Si** at 300 °C (a), 400 °C (b) and 500 °C (c).

**Fig. S21:** SEM of **1\_Si** at 300 °C (a), 400 °C (b) and 500 °C (c).

**Fig. S22:** SEM of **1\_Si** at 300 °C (a), 400 °C (b) and 500 °C (c).

**Fig. S23:** EDX spectrum of **1\_AI**

**Fig. S24:** EDX spectrum of **2\_AI**

**Fig. S25:** EDX spectrum of **3\_AI**

**Fig. S26:** EDX spectrum of **4\_AI**

**Fig. S27:** XRD of **1\_Si**.

**Fig. S28:** XRD of **2\_Si**.

**Fig. S29:** XRD of **3\_Si**.

**Fig. S30:** XRD of **4\_Si**.

**Fig. S31:** SEM image of **1\_AI**.

**Fig. S32:** Cross section SEM image of **1\_AI**.

**Fig. S33:** SEM image of **2\_AI**.

**Fig. S34:** Cross section SEM image of **2\_AI**.

**Fig. S35:** SEM image of **3\_AI**.

**Fig. S36:** Cross section SEM image of **3\_AI**.

**Fig. S37:** SEM image of **4\_AI**.

**Fig. S38:** Cross section SEM image of **4\_AI**.

**Fig. S39:** XPS of **1\_AI**. Survey (a), Fe 2p (b), O 1s (c) and C 1s (d).

**Fig. S40:** XPS of **1\_AI** after calcination. Survey (a), Fe 2p (b), O 1s (c) and C 1s (d).

**Fig. S41:** XPS of **2\_AI**. Survey (a), Ni 2p (b), O 1s (c) and C 1s (d).

**Fig. S42:** XPS of **2\_AI** after calcination. Survey (a), Ni 2p (b), O 1s (c) and C 1s (d).

**Fig. S43:** XPS of **3\_AI**. Survey (a), Cu 2p (b), O 1s (c) and C 1s (d).

**Fig. S44:** XPS of **3\_AI** after calcination. Survey (a), Cu 2p (b), O 1s (c) and C 1s (d).

**Fig. S45:** Cu LMM spectra of **3\_AI** before and after calcination.

**Fig. S46:** XPS of **4\_AI**. Survey (a), Zn 2p (b), O 1s (c) and C 1s (d).

**Fig. S47:** XPS of **4\_AI** after calcination. Survey (a), Zn 2p (b), O 1s (c) and C 1s (d).

**Fig. S48:** Zn LMM spectra of **4\_AI** before and after calcination.

**Tab. S1:** Crystal Data and Structure Refinement for **1**.

**Tab. S2:** Crystal Data and Structure Refinement for **2**.

**Tab. S3:** Crystal Data and Structure Refinement for **3**.

**Tab. S4:** Crystal Data and Structure Refinement for **4**.

**Tab. S5:** Overview on intermolecular contacts in **1-4**.

**Tab. S6:** Experimental conditions.

**Tab. S7:** Calculation of the mod. Auger parameter for **3\_AI**

**Tab. S8:** Calculation of the mod. Auger parameter for **4\_AI**



**Tab. S1:** Crystal Data and Structure Refinement for **1**.

|                                                    |                                                                                                    |
|----------------------------------------------------|----------------------------------------------------------------------------------------------------|
| Empirical Formula                                  | C <sub>16</sub> H <sub>24</sub> F <sub>6</sub> N <sub>2</sub> O <sub>4</sub> Fe                    |
| Formular weight                                    | 478.22 Da                                                                                          |
| Density (calculated)                               | 1.509 g · cm <sup>-3</sup>                                                                         |
| F (000)                                            | 984                                                                                                |
| Temperature                                        | 100(2) K                                                                                           |
| Crystal size                                       | 0.322 x 0.156 x 0.098 mm                                                                           |
| Crystal appearance                                 | red tablet                                                                                         |
| Wavelength (MoK <sub>α</sub> )                     | 0.71073 Å                                                                                          |
| Crystal system                                     | Monoclinic                                                                                         |
| Space group                                        | <i>P</i> 2 <sub>1</sub> / <i>c</i>                                                                 |
| Unit cell volume                                   | a = 8.2798(9) Å<br>b = 26.236(3) Å<br>c = 10.1171(11) Å<br>α = 90°<br>β = 106.7333(16)°<br>γ = 90° |
| Unit cell volume                                   | 2104.6(4) Å <sup>3</sup>                                                                           |
| Z                                                  | 4                                                                                                  |
| Cell measurement reflections used                  | 9940                                                                                               |
| θ range for cell measurement                       | 2.24° to 24.80°                                                                                    |
| Diffractometer used for measurement                | Bruker D8 KAPPA II (APEX II detector)                                                              |
| Diffractometer control software                    | BRUKER APEX3 (v2019.1-0)                                                                           |
| Measurement method                                 | Data collection strategy APEX 3/QUEEN                                                              |
| θ range for data collection                        | 2.613° to 30.749°                                                                                  |
| Completeness to θ = 25.242° (to θ <sub>max</sub> ) | 99.9% (99.5%)                                                                                      |
| Index ranges                                       | -11 ≤ h ≤ 11<br>0 ≤ k ≤ 37<br>0 ≤ l ≤ 14                                                           |
| Computing data reduction                           | BRUKER APEX3 (v2019.1-0)                                                                           |
| Absorption correction                              | Semi-empirical form equivalents                                                                    |
| Absorption coefficient                             | 0.792 mm <sup>-1</sup>                                                                             |
| Absorption correction computing                    | TWINABS                                                                                            |
| Max./min. transmission                             | 0.75/0.61                                                                                          |

|                                            |                                                                                          |
|--------------------------------------------|------------------------------------------------------------------------------------------|
| $R_{\text{merge}}$ before/after correction | 0.0678/0.0551 and 0.0902/0.0653                                                          |
| Computing structure solution               | BRUKER APEX3 (v2019.1-0)                                                                 |
| Computing structure refinement             | SHELXL-2017/1 (Sheldrick, 2017)                                                          |
| Refinement method                          | Full-matrix least-squares on $F^2$                                                       |
| Reflections collected                      | 117073                                                                                   |
| Independent reflections                    | 6534 ( $R_{\text{int}} = 0.0797$ )                                                       |
| Reflections with $I > 2\sigma(I)$          | 5293                                                                                     |
| Data / restraints / parameter              | 6534 / 142 / 324                                                                         |
| Goodness-of-fit on $F^2$                   | 1.075                                                                                    |
| Weighting details                          | $\omega = 1/[\sigma^2(F_o^2) + (0.0395P)^2 + 0.9427P]$<br>where $P = (F_o^2 + 2F_c^2)/3$ |
| R indices [ $I > 2\sigma(I)$ ]             | $R1 = 0.0416$<br>$\omega R2 = 0.0866$                                                    |
| R indices [all data]                       | $R1 = 0.0605$<br>$\omega R2 = 0.0931$                                                    |
| Largest diff. peak and hole                | 0.591 and $-0.299 \text{ \AA}^{-3}$                                                      |

**Tab. S2:** Crystal Data and Structure Refinement for **2**.

|                                                    |                                                                                                    |
|----------------------------------------------------|----------------------------------------------------------------------------------------------------|
| Empirical Formula                                  | C <sub>16</sub> H <sub>24</sub> F <sub>6</sub> N <sub>2</sub> O <sub>4</sub> Ni                    |
| Formular weight                                    | 481.08 Da                                                                                          |
| Density (calculated)                               | 1.552 g · cm <sup>-3</sup>                                                                         |
| F (000)                                            | 992                                                                                                |
| Temperature                                        | 100(2) K                                                                                           |
| Crystal size                                       | 0.350 x 0.216 x 0.208 mm                                                                           |
| Crystal appearance                                 | blue tablet                                                                                        |
| Wavelength (MoK <sub>α</sub> )                     | 0.71073 Å                                                                                          |
| Crystal system                                     | Monoclinic                                                                                         |
| Space group                                        | <i>P</i> 2 <sub>1</sub> / <i>c</i>                                                                 |
| Unit cell volume                                   | a = 8.1121(5) Å<br>b = 20.0344(13) Å<br>c = 12.6691(8) Å<br>α = 90°<br>β = 91.0753(15)°<br>γ = 90° |
| Unit cell volume                                   | 2058.6(2) Å <sup>3</sup>                                                                           |
| Z                                                  | 4                                                                                                  |
| Cell measurement reflections used                  | 9716                                                                                               |
| θ range for cell measurement                       | 3.17° to 33.32°                                                                                    |
| Diffractometer used for measurement                | Bruker D8 KAPPA II (APEX II detector)                                                              |
| Diffractometer control software                    | BRUKER APEX3 (v2019.1-0)                                                                           |
| Measurement method                                 | Data collection strategy APEX 3/QUEEN                                                              |
| θ range for data collection                        | 1.902° to 33.425°                                                                                  |
| Completeness to θ = 25.242° (to θ <sub>max</sub> ) | 99.9% (99.8%)                                                                                      |
| Index ranges                                       | -12 ≤ h ≤ 12<br>-30 ≤ k ≤ 31<br>-19 ≤ l ≤ 13                                                       |
| Computing data reduction                           | BRUKER APEX3 (v2019.1-0)                                                                           |
| Absorption correction                              | Semi-empirical form equivalents                                                                    |
| Absorption coefficient                             | 1.020 mm <sup>-1</sup>                                                                             |
| Absorption correction computing                    | SADABS                                                                                             |
| Max./min. transmission                             | 0.75/0.66                                                                                          |

|                                            |                                                                                          |
|--------------------------------------------|------------------------------------------------------------------------------------------|
| $R_{\text{merge}}$ before/after correction | 0.0445/0.0352                                                                            |
| Computing structure solution               | BRUKER APEX3 (v2019.1-0)                                                                 |
| Computing structure refinement             | SHELXL-2017/1 (Sheldrick, 2017)                                                          |
| Refinement method                          | Full-matrix least-squares on $F^2$                                                       |
| Reflections collected                      | 82511                                                                                    |
| Independent reflections                    | 8019 ( $R_{\text{int}} = 0.0226$ )                                                       |
| Reflections with $I > 2\sigma(I)$          | 7248                                                                                     |
| Data / restraints / parameter              | 8019 / 53 / 327                                                                          |
| Goodness-of-fit on $F^2$                   | 1.046                                                                                    |
| Weighting details                          | $\omega = 1/[\sigma^2(F_o^2) + (0.0353P)^2 + 0.6264P]$<br>where $P = (F_o^2 + 2F_c^2)/3$ |
| R indices [ $I > 2\sigma(I)$ ]             | $R1 = 0.0245$<br>$\omega R2 = 0.0642$                                                    |
| R indices [all data]                       | $R1 = 0.0286$<br>$\omega R2 = 0.0667$                                                    |
| Largest diff. peak and hole                | 0.557 and $-0.353 \text{ \AA}^{-3}$                                                      |

**Tab. S3:** Crystal Data and Structure Refinement for **3**.

|                                                    |                                                                                                       |
|----------------------------------------------------|-------------------------------------------------------------------------------------------------------|
| Empirical Formula                                  | C <sub>16</sub> H <sub>24</sub> F <sub>6</sub> N <sub>2</sub> OCu                                     |
| Formular weight                                    | 495.91 Da                                                                                             |
| Density (calculated)                               | 1.541 g · cm <sup>-3</sup>                                                                            |
| F (000)                                            | 996                                                                                                   |
| Temperature                                        | 100(2) K                                                                                              |
| Crystal size                                       | 0.362 x 0.325 x 0.110 mm                                                                              |
| Crystal appearance                                 | green plate                                                                                           |
| Wavelength (MoK <sub>α</sub> )                     | 0.71073 Å                                                                                             |
| Crystal system                                     | Monoclinic                                                                                            |
| Space group                                        | <i>P2<sub>1</sub>/n</i>                                                                               |
| Unit cell volume                                   | a = 9.7772(10) Å<br>b = 15.3822(16) Å<br>c = 14.6761(15) Å<br>α = 90°<br>β = 108.4413(16)°<br>γ = 90° |
| Unit cell volume                                   | 2093.9(4) Å <sup>3</sup>                                                                              |
| Z                                                  | 4                                                                                                     |
| Cell measurement reflections used                  | 9810                                                                                                  |
| θ range for cell measurement                       | 2.56° to 32.98°                                                                                       |
| Diffractometer used for measurement                | Bruker D8 KAPPA II (APEX II detector)                                                                 |
| Diffractometer control software                    | BRUKER APEX3 (v2019.1-0)                                                                              |
| Measurement method                                 | Data collection strategy APEX 3/QUEEN                                                                 |
| θ range for data collection                        | 2.220° to 33.481°                                                                                     |
| Completeness to θ = 25.242° (to θ <sub>max</sub> ) | 100% (99.3%)                                                                                          |
| Index ranges                                       | -15 ≤ h ≤ 15<br>-23 ≤ k ≤ 23<br>-22 ≤ l ≤ 22                                                          |
| Computing data reduction                           | BRUKER APEX3 (v2019.1-0)                                                                              |
| Absorption correction                              | Semi-empirical form equivalents                                                                       |
| Absorption coefficient                             | 1.119 mm <sup>-1</sup>                                                                                |
| Absorption correction computing                    | SADABS                                                                                                |
| Max./min. transmission                             | 0.75/0.60                                                                                             |



|                                            |                                                                                          |
|--------------------------------------------|------------------------------------------------------------------------------------------|
| $R_{\text{merge}}$ before/after correction | 0.0647/0.0448                                                                            |
| Computing structure solution               | BRUKER APEX3 (v2019.1-0)                                                                 |
| Computing structure refinement             | SHELXL-2017/1 (Sheldrick, 2017)                                                          |
| Refinement method                          | Full-matrix least-squares on $F^2$                                                       |
| Reflections collected                      | 70229                                                                                    |
| Independent reflections                    | 8143 ( $R_{\text{int}} = 0.0384$ )                                                       |
| Reflections with $I > 2\sigma(I)$          | 6554                                                                                     |
| Data / restraints / parameter              | 8143 / 349 / 353                                                                         |
| Goodness-of-fit on $F^2$                   | 1.053                                                                                    |
| Weighting details                          | $\omega = 1/[\sigma^2(F_o^2) + (0.0348P)^2 + 0.9588P]$<br>where $P = (F_o^2 + 2F_c^2)/3$ |
| R indices [ $I > 2\sigma(I)$ ]             | $R1 = 0.0291$<br>$\omega R2 = 0.0696$                                                    |
| R indices [all data]                       | $R1 = 0.0448$<br>$\omega R2 = 0.0782$                                                    |
| Largest diff. peak and hole                | 0.623 and $-0.657 \text{ \AA}^{-3}$                                                      |

**Tab. S4:** Crystal Data and Structure Refinement for **4**.

|                                                    |                                                                                            |
|----------------------------------------------------|--------------------------------------------------------------------------------------------|
| Empirical Formula                                  | C <sub>16</sub> H <sub>24</sub> F <sub>6</sub> N <sub>2</sub> O <sub>4</sub> Zn            |
| Formular weight                                    | 487.74 Da                                                                                  |
| Density (calculated)                               | 1.437 g · cm <sup>-3</sup>                                                                 |
| F (000)                                            | 1000                                                                                       |
| Temperature                                        | 100(2) K                                                                                   |
| Crystal size                                       | 0.541 x 0.359 x 0.190 mm                                                                   |
| Crystal appearance                                 | colourless tablet                                                                          |
| Wavelength (MoK <sub>α</sub> )                     | 0.71073 Å                                                                                  |
| Crystal system                                     | Monoclinic                                                                                 |
| Space group                                        | <i>P</i> 2 <sub>1</sub> / <i>c</i>                                                         |
| Unit cell volume                                   | a = 8.323(19) Å<br>b = 20.79(5) Å<br>c = 13.03(3) Å<br>α = 90°<br>β = 90.27(4)°<br>γ = 90° |
| Unit cell volume                                   | 2254(9) Å <sup>3</sup>                                                                     |
| Z                                                  | 4                                                                                          |
| Cell measurement reflections used                  | 4056                                                                                       |
| θ range for cell measurement                       | 3.69° to 30.34°                                                                            |
| Diffractometer used for measurement                | Bruker D8 KAPPA II (APEX II detector)                                                      |
| Diffractometer control software                    | BRUKER APEX3 (v2019.1-0)                                                                   |
| Measurement method                                 | Data collection strategy APEX 2/COSMO                                                      |
| θ range for data collection                        | 3.826° to 31.386°                                                                          |
| Completeness to θ = 25.242° (to θ <sub>max</sub> ) | 98.8% (93.9%)                                                                              |
| Index ranges                                       | -9 ≤ h ≤ 11<br>-29 ≤ k ≤ 29<br>-19 ≤ l ≤ 18                                                |
| Computing data reduction                           | BRUKER APEX3 (v2019.1-0)                                                                   |
| Absorption correction                              | Semi-empirical form equivalents                                                            |
| Absorption coefficient                             | 1.160 mm <sup>-1</sup>                                                                     |
| Absorption correction computing                    | SADABS                                                                                     |
| Max./min. transmission                             | 0.75/0.62                                                                                  |

|                                            |                                                                                          |
|--------------------------------------------|------------------------------------------------------------------------------------------|
| $R_{\text{merge}}$ before/after correction | 0.1676/0.0869                                                                            |
| Computing structure solution               | BRUKER APEX3 (v2019.1-0)                                                                 |
| Computing structure refinement             | SHELXL-2017/1 (Sheldrick, 2017)                                                          |
| Refinement method                          | Full-matrix least-squares on $F^2$                                                       |
| Reflections collected                      | 43803                                                                                    |
| Independent reflections                    | 6974 ( $R_{\text{int}} = 0.0450$ )                                                       |
| Reflections with $I > 2\sigma(I)$          | 5203                                                                                     |
| Data / restraints / parameter              | 6974 / 132 / 324                                                                         |
| Goodness-of-fit on $F^2$                   | 1.090                                                                                    |
| Weighting details                          | $\omega = 1/[\sigma^2(F_o^2) + (0.0475P)^2 + 1.6161P]$<br>where $P = (F_o^2 + 2F_c^2)/3$ |
| R indices [ $I > 2\sigma(I)$ ]             | $R1 = 0.0538$<br>$\omega R2 = 0.1364$                                                    |
| R indices [all data]                       | $R1 = 0.0739$<br>$\omega R2 = 0.1459$                                                    |
| Largest diff. peak and hole                | 0.585 and $-0.309 \text{ \AA}^{-3}$                                                      |

**Tab. S5:** Overview on intermolecular contacts in **1-4**.

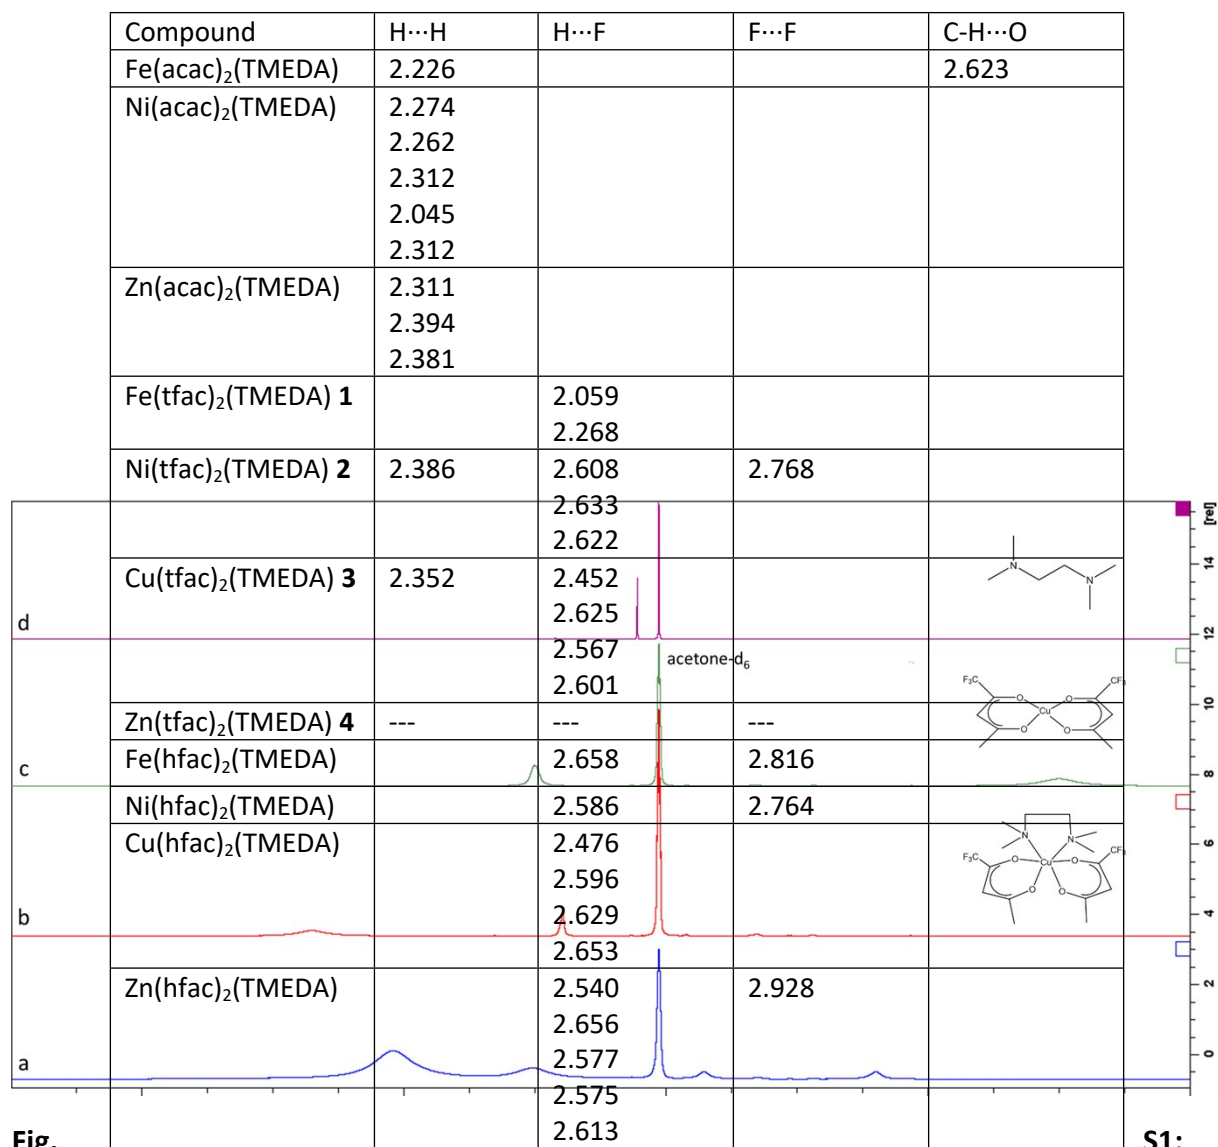

**Fig.**

**S1:**

<sup>1</sup>H-NMR of the black residue after heating **3** at 120 °C for 3 h under inert conditions at atmospheric pressure. (a). The comparison with the spectrum of **3** (b) shows the complete degradation of the starting material. Further comparison with the spectra of Cu(tfac)<sub>2</sub> (c) and TMEDA (d) excludes the loss of TMEDA as decomposing pathway. All spectra were recorded in acetone-d<sub>6</sub>.

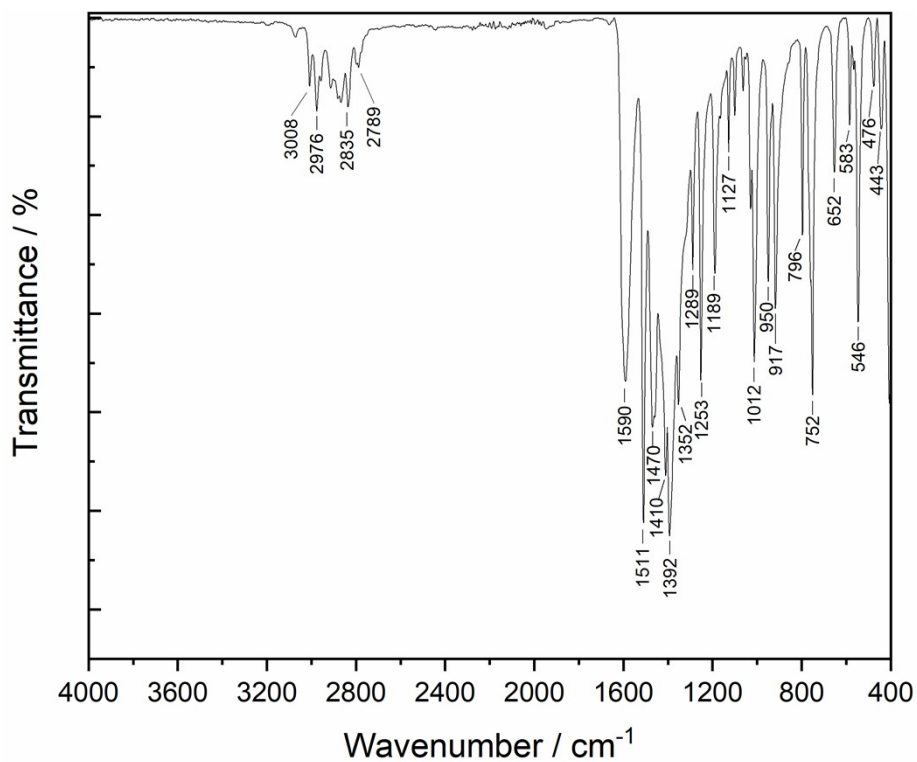

**Fig. S2:** ATR-IR spectrum of Fe(acac)<sub>2</sub>(TMEDA).

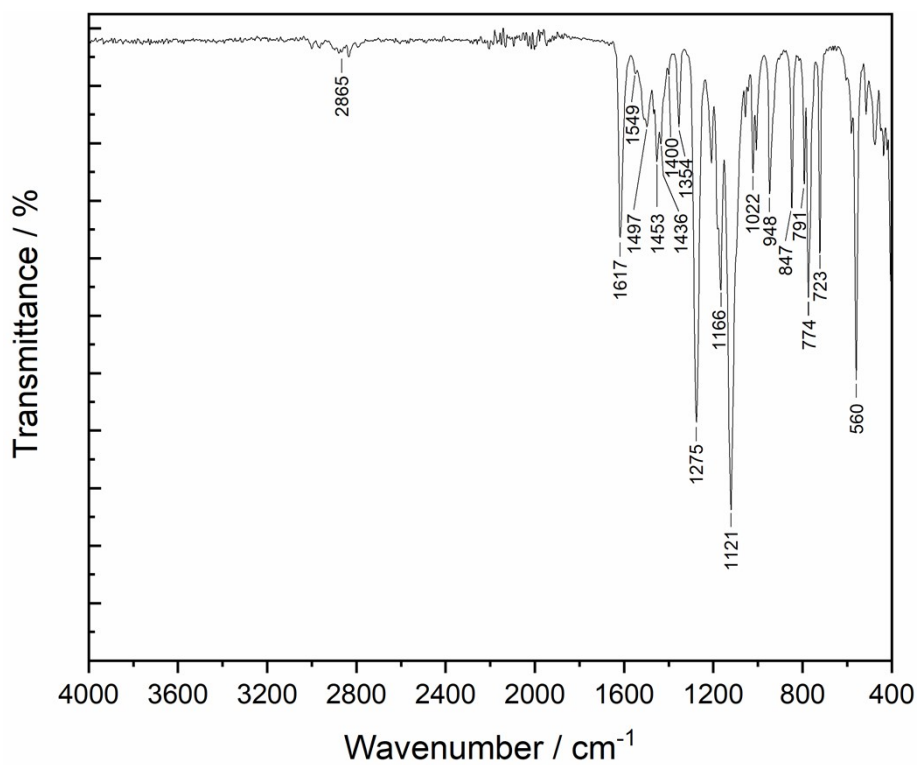

**Fig. S3:** ATR-IR spectrum of Fe(tfac)<sub>2</sub>(TMEDA) 2.

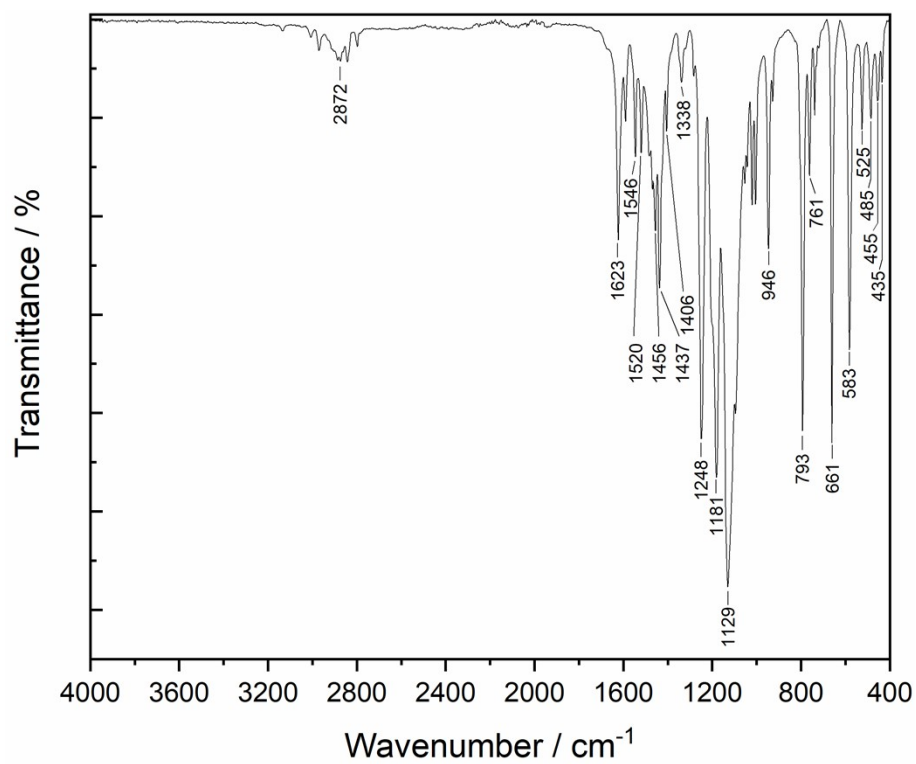

**Fig. S4:** ATR-IR spectrum of Fe(hfac)<sub>2</sub>(TMEDA).

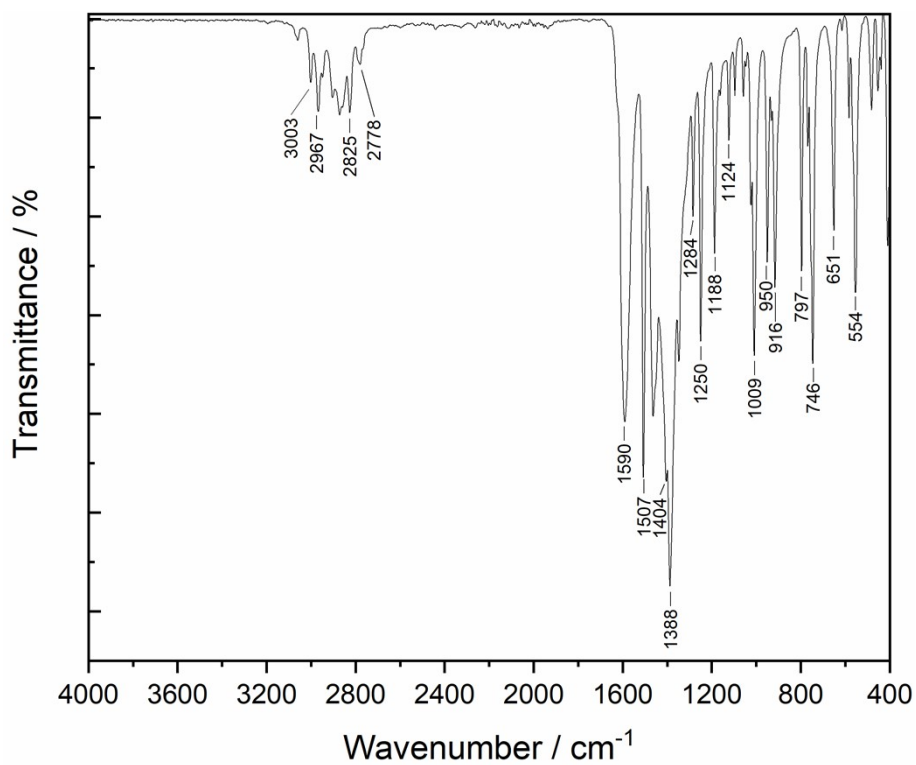

**Fig. S5:** ATR-IR spectrum of Ni(acac)<sub>2</sub>(TMEDA).

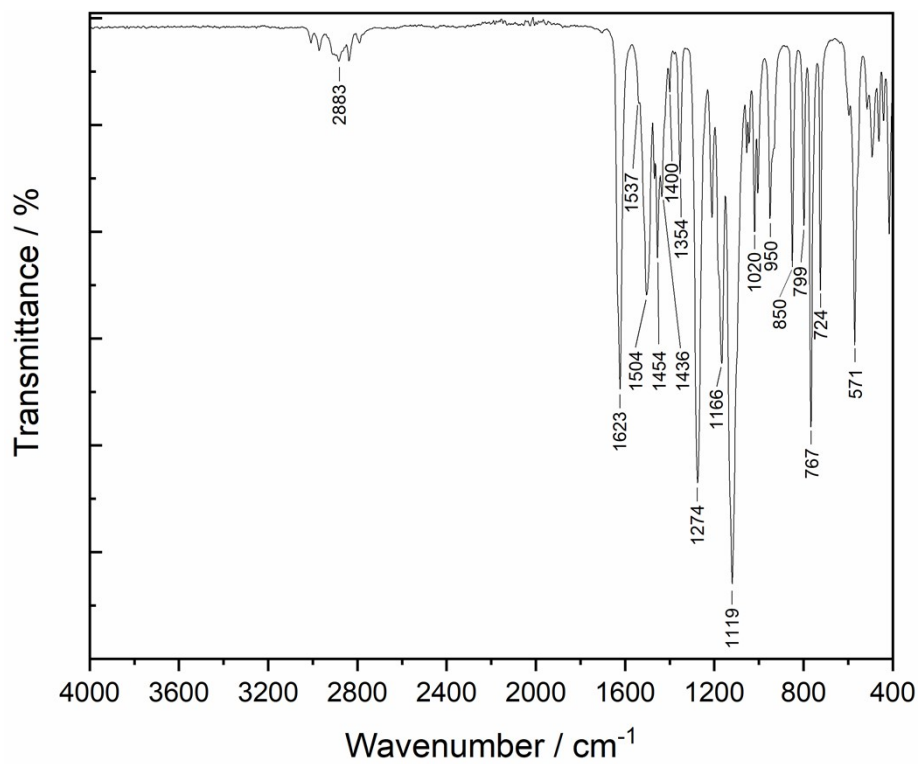

**Fig. S6:** ATR-IR spectrum of Ni(tfac)<sub>2</sub>(TMEDA) **2**.

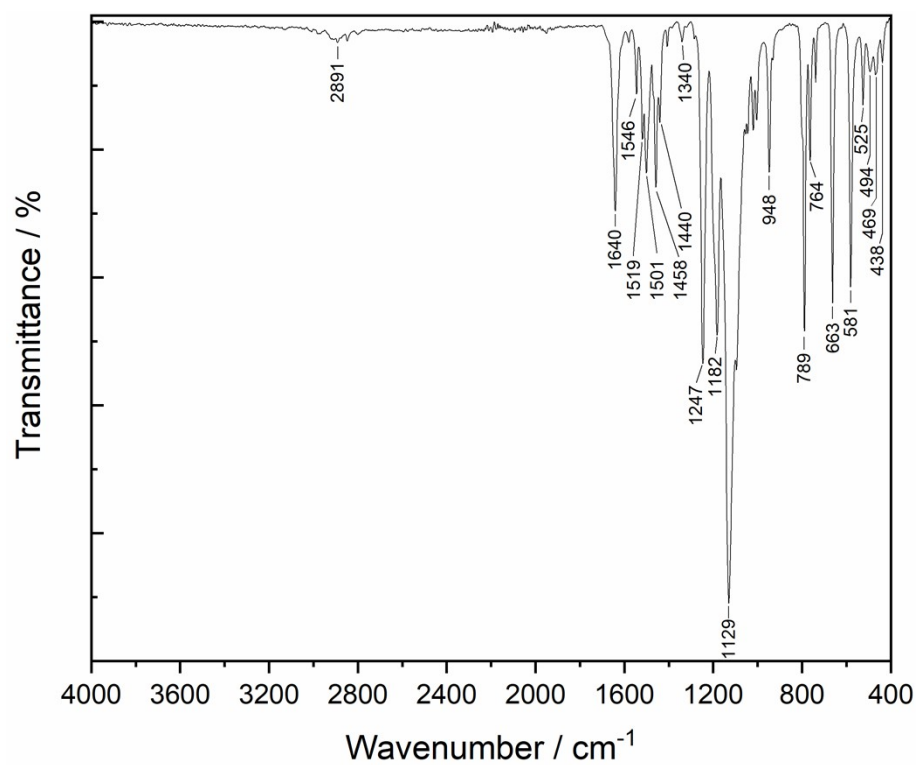

**Fig. S7:** ATR-IR spectrum of Ni(hfac)<sub>2</sub>(TMEDA).

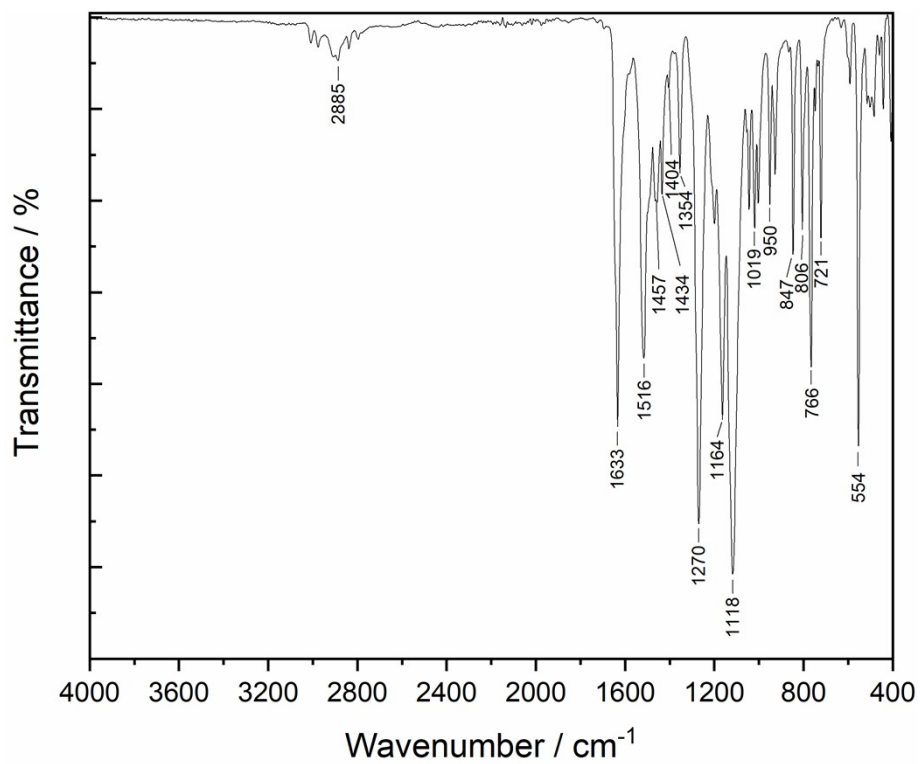

**Fig. S8:** ATR-IR spectrum of Cu(tfac)<sub>2</sub>(TMEDA) **3**.

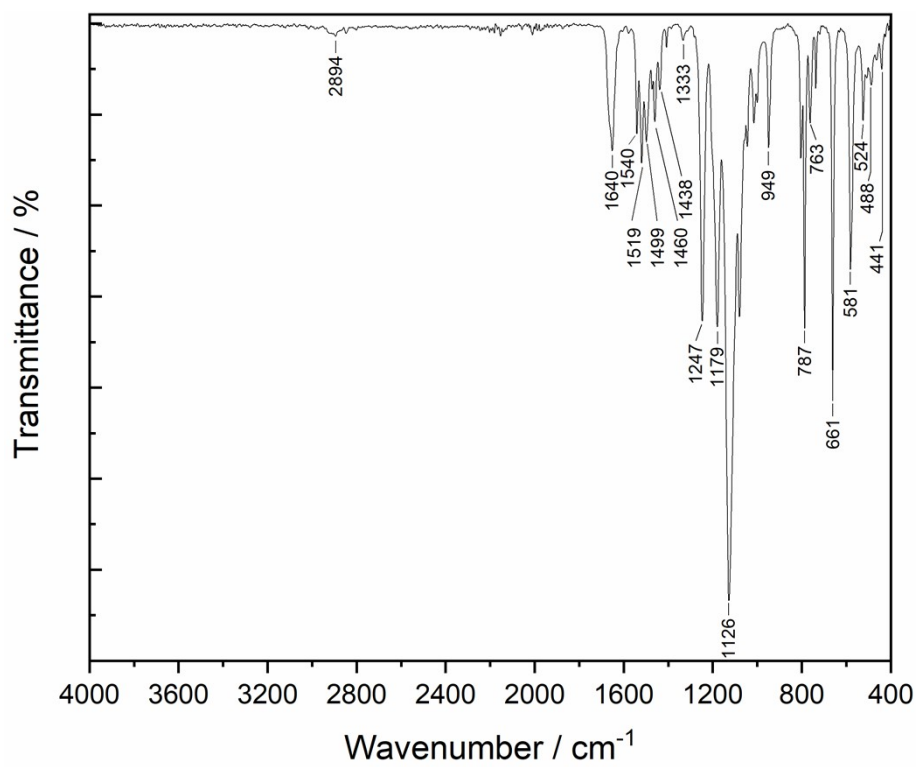

**Fig. S9:** ATR-IR spectrum of Cu(hfac)<sub>2</sub>(TMEDA).



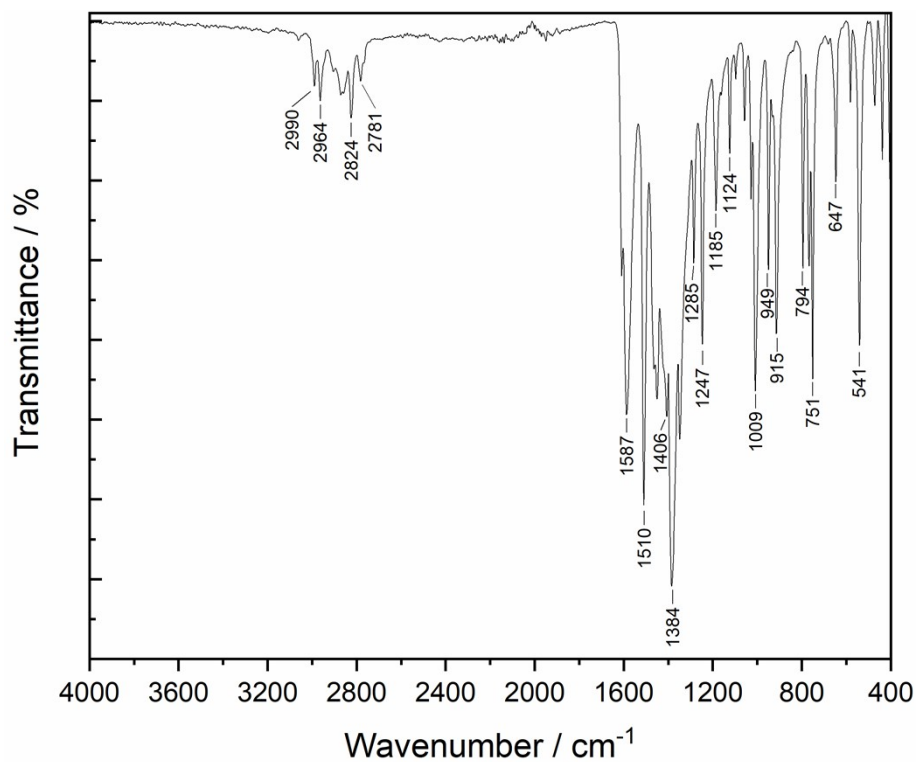

**Fig. S10:** ATR-IR spectrum of Zn(acac)<sub>2</sub>(TMEDA).

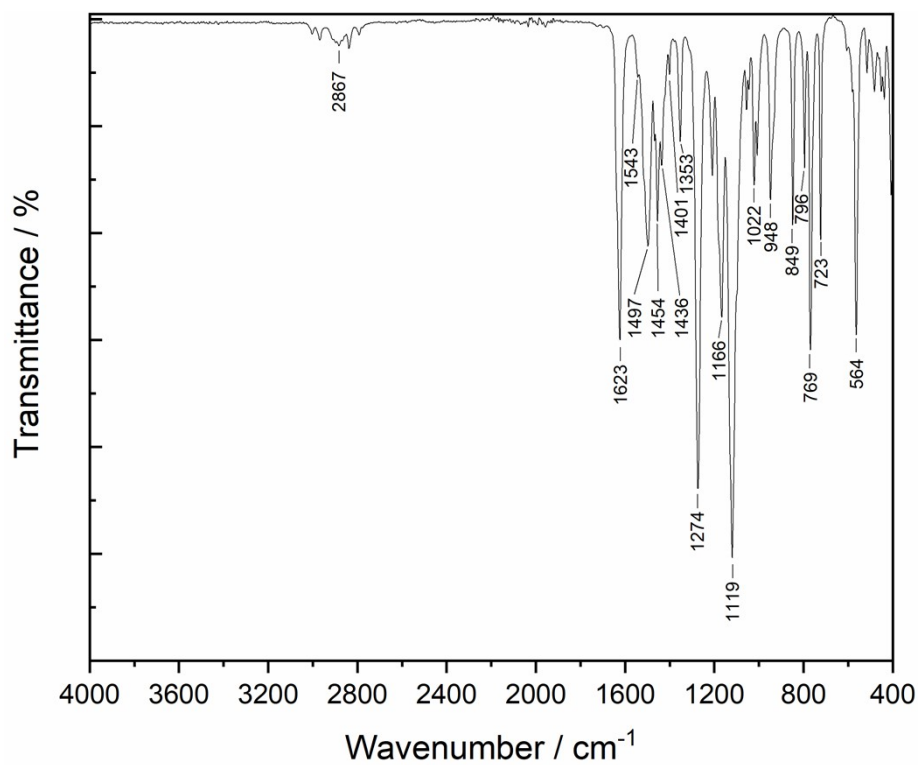

**Fig. S11:** ATR-IR spectrum of Zn(tfac)<sub>2</sub>(TMEDA) 4.

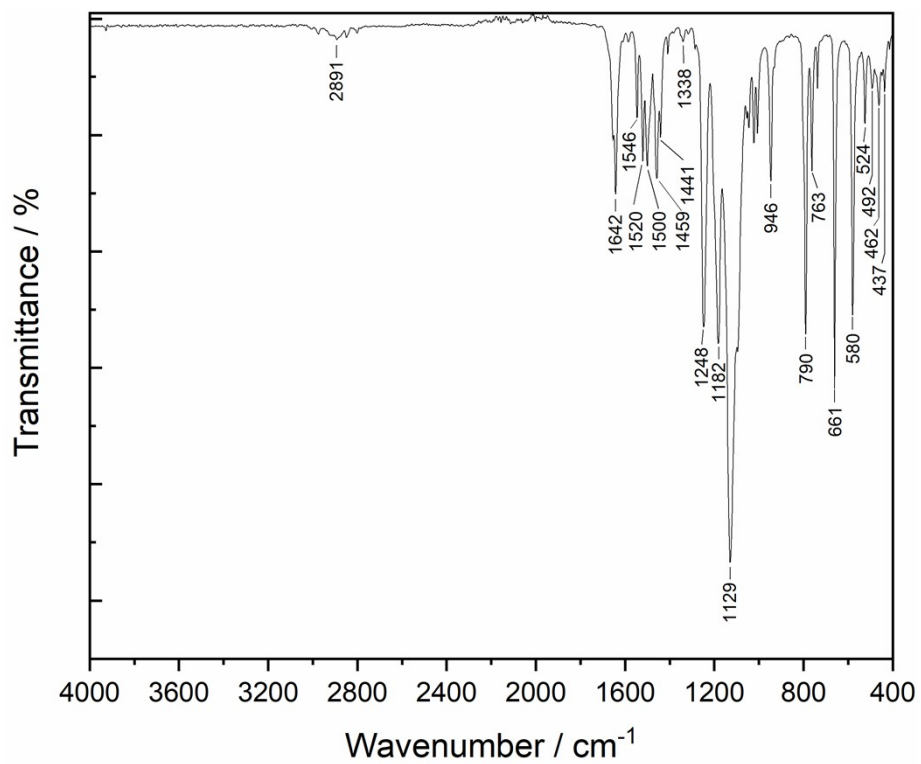

**Fig. S12:** ATR-IR spectrum of Zn(hfac)<sub>2</sub>(TMEDA).

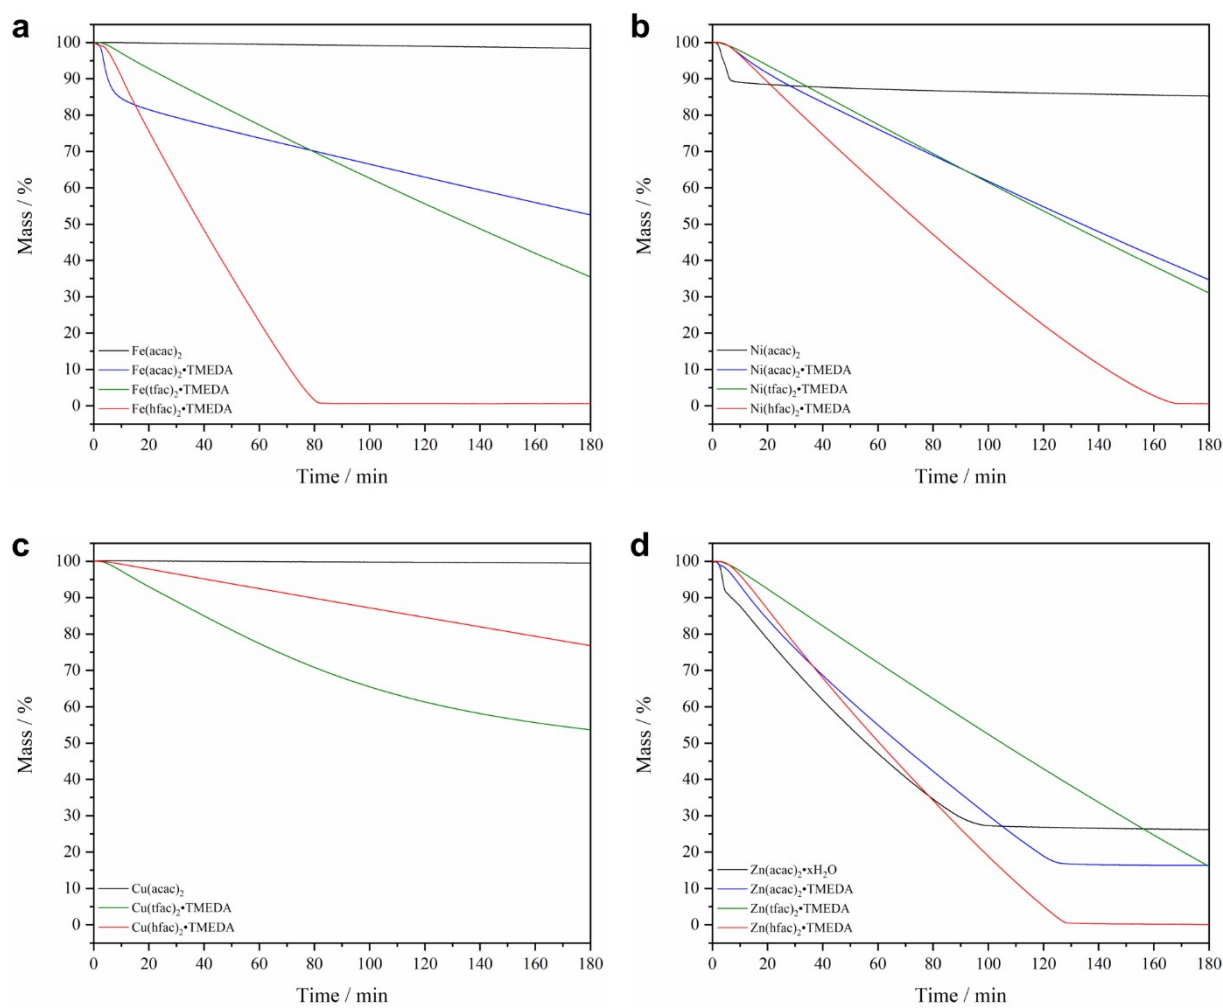

**Fig. S13:** Isothermal TGA curves (125 °C) for  $M(\text{acac})_2$ ,  $M(\text{acac})_2(\text{TMEDA})$ ,  $M(\text{tfac})_2(\text{TMEDA})$  and  $M(\text{hfac})_2(\text{TMEDA})$  ( $M = \text{Fe}$  (a),  $\text{Ni}$  (b),  $\text{Cu}$  (c) and  $\text{Zn}$  (d)).

For the PXRD analysis of **1-4**, crystalline samples were grinded and measured with Cu-K $\alpha$  radiation. Theoretical X-ray patterns were calculated from the crystal structures using the Mercury software (Version 4.2.0, Cambridge Crystallographic Data Centre) and displayed as vertical red and blue bars. While for **1** a mixture of two polymorphic structures was observed, good agreements were found between the calculated and the experimental X-ray pattern for **2-4**, excluding the presence of polymorphs.

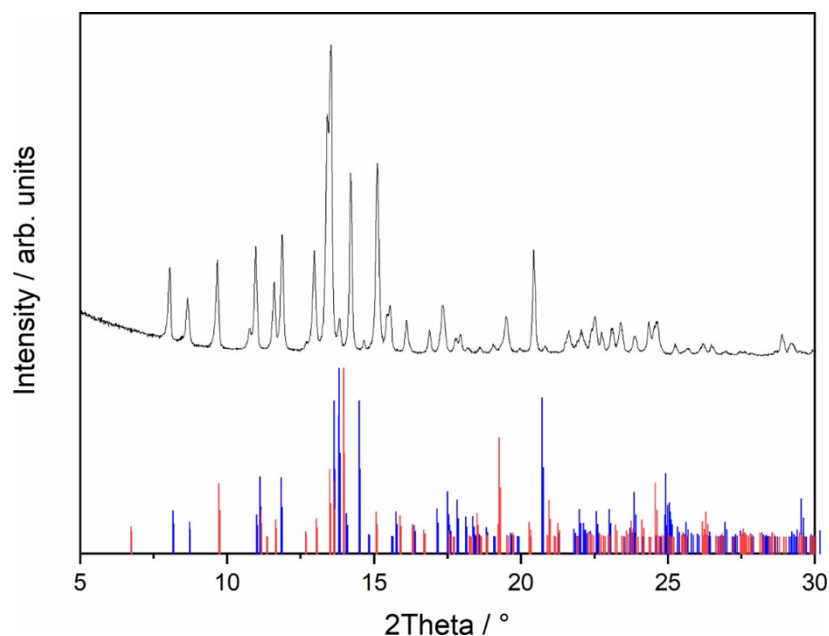

**Fig. S14:** PXRD of **1**. Calculated position of the reflections from the crystal structure as vertical bars. **1** (red) and Fe(tfac)<sub>2</sub>(TMEDA)<sup>[1]</sup> (blue).

[1] M. Klotzsche, D. Barreca, L. Bigiani, R. Seraglia, A. Gasparotto, L. Vanin, C. Jandl, A. Pöthig, M. Roverso, S. Bogialli, G. Tabacchi, E. Fois, E. Callone, S. Dirè, C. Maccato, Dalton. Trans.; 2021, 50, 10374–10385.

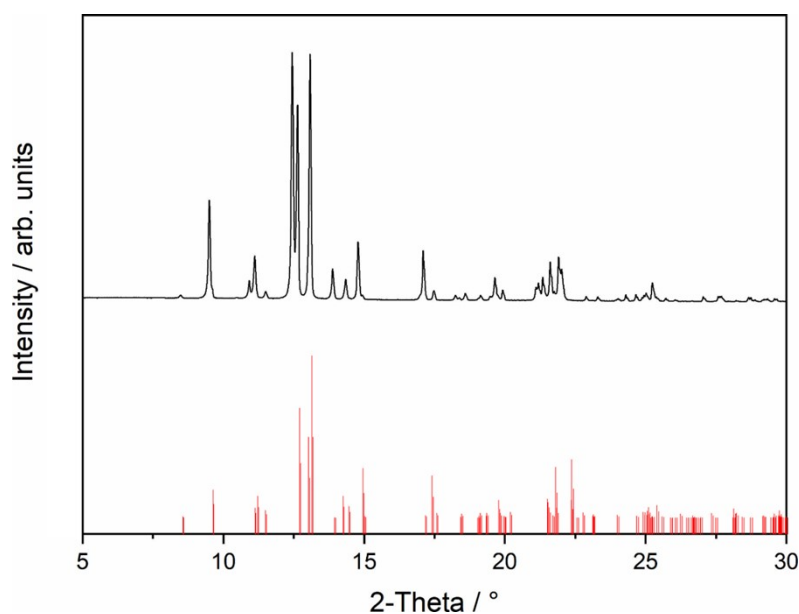

**Fig. S15:** PXRD of **2**. Calculated position of the reflections from the crystal structure as vertical bars.

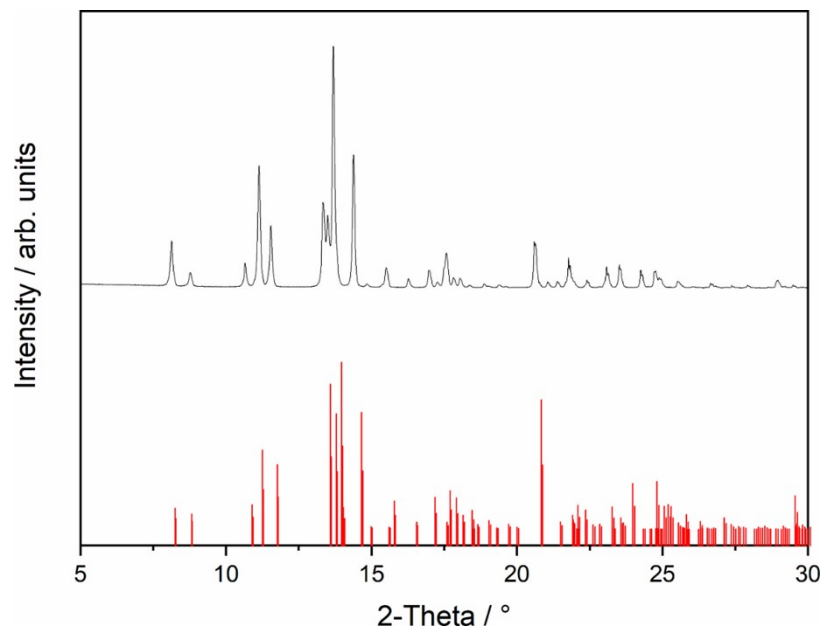

**Fig. S16:** PXRD of **3**. Calculated position of the reflections from the crystal structure as vertical bars.

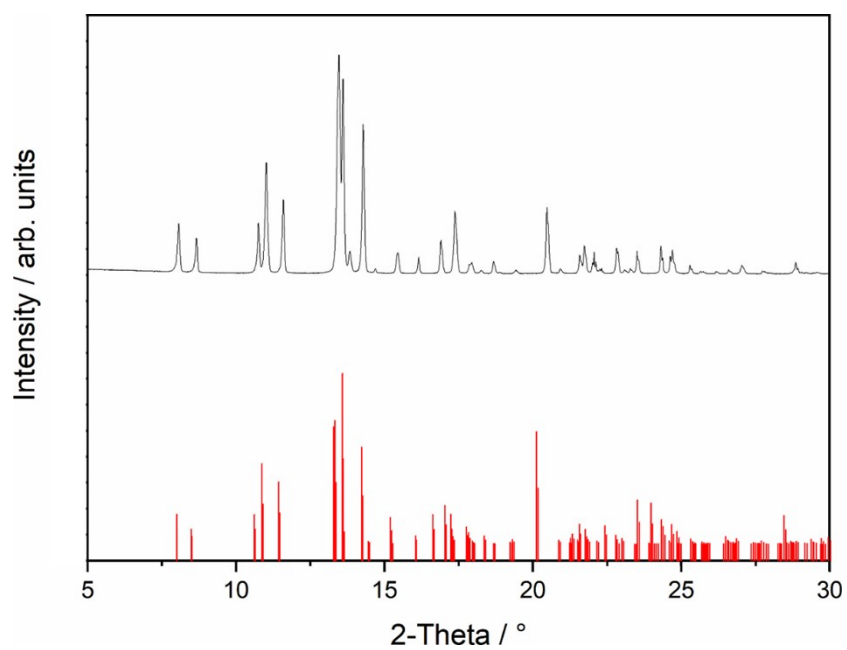

**Fig. S17:** PXRD of **4**. Calculated position of the reflections from the crystal structure as vertical bars.

**Tab. S6:** Experimental conditions.

| sample name | precursor                     | evaporation temperature [°C] | deposition temperature [°C] | deposition pressure [mbar] | deposition time [min] | substrate                             |
|-------------|-------------------------------|------------------------------|-----------------------------|----------------------------|-----------------------|---------------------------------------|
| 1_Al        | Fe(tfac) <sub>2</sub> (TMEDA) | 100                          | 500                         | 0.35                       | 20                    | Al <sub>2</sub> O <sub>3</sub> (0001) |
| 1_Si        | Fe(tfac) <sub>2</sub> (TMEDA) | 100                          | 300-500                     | 0.35                       | 20                    | Si (100)                              |
| 2_Al        | Ni(tfac) <sub>2</sub> (TMEDA) | 100                          | 500                         | 0.35                       | 20                    | Al <sub>2</sub> O <sub>3</sub> (0001) |
| 2_Si        | Ni(tfac) <sub>2</sub> (TMEDA) | 100                          | 300-500                     | 0.35                       | 20                    | Si (100)                              |
| 3_Al        | Cu(tfac) <sub>2</sub> (TMEDA) | 100                          | 500                         | 0.35                       | 20                    | Al <sub>2</sub> O <sub>3</sub> (0001) |
| 3_Si        | Cu(tfac) <sub>2</sub> (TMEDA) | 100                          | 300-500                     | 0.35                       | 20                    | Si (100)                              |
| 4_Si        | Zn(tfac) <sub>2</sub> (TMEDA) | 100                          | 500                         | 0.35                       | 20                    | Al <sub>2</sub> O <sub>3</sub> (0001) |
| 4_Si        | Zn(tfac) <sub>2</sub> (TMEDA) | 100                          | 300-500                     | 0.35                       | 20                    | Si (100)                              |

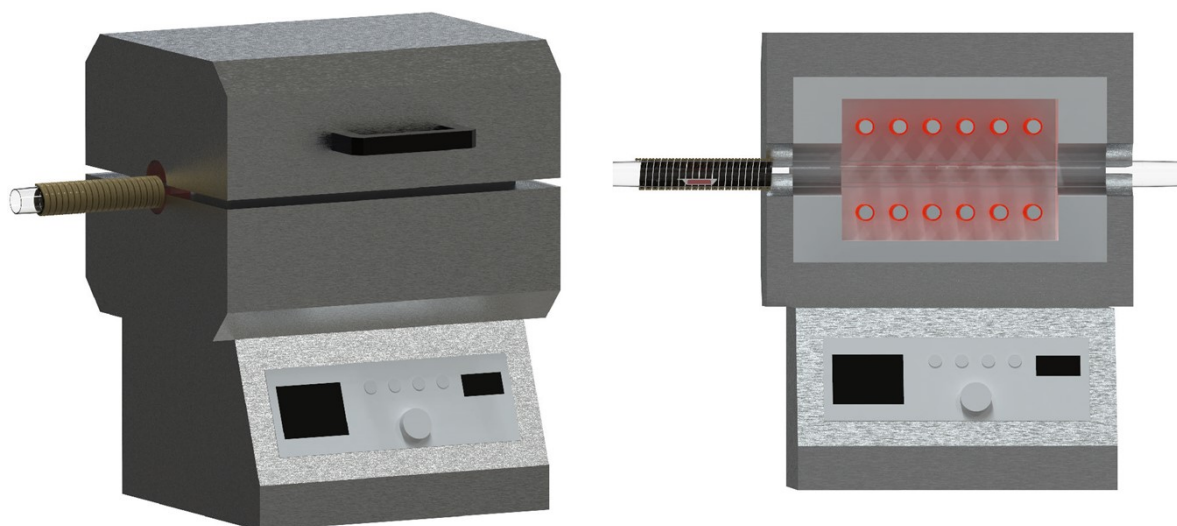

**Fig. S18:** 3D model of the reactor used in this paper. Side view (left) and front view with cross section (right). Gas supply system and vacuum system are not shown.

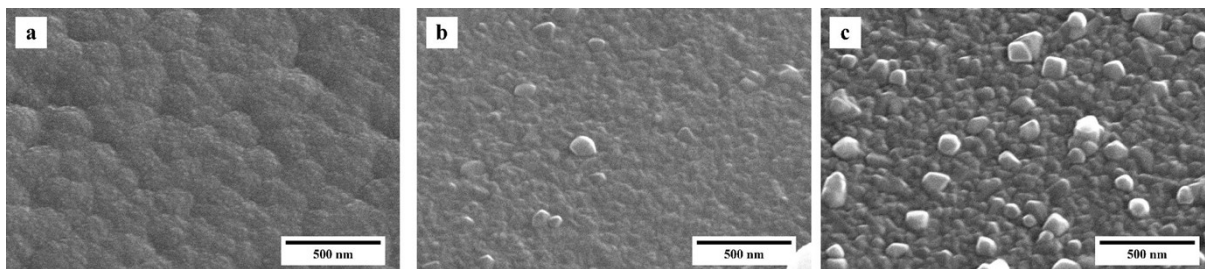

**Fig. S19:** SEM of **1\_Si** at 300 °C (a), 400 °C (b) and 500 °C (c).

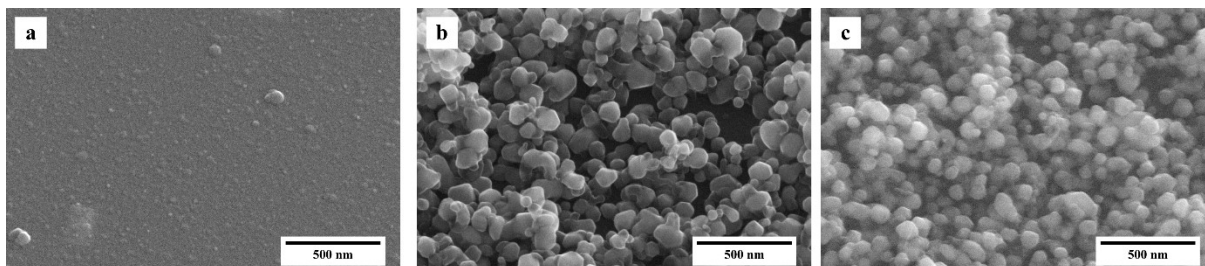

**Fig. S20:** SEM of **2\_Si** at 300 °C (a), 400 °C (b) and 500 °C (c).

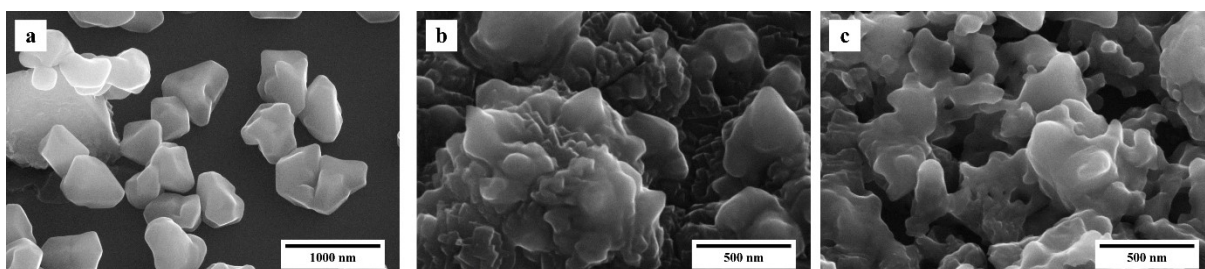

**Fig. S21:** SEM of **3\_Si** at 300 °C (a), 400 °C (b) and 500 °C (c).

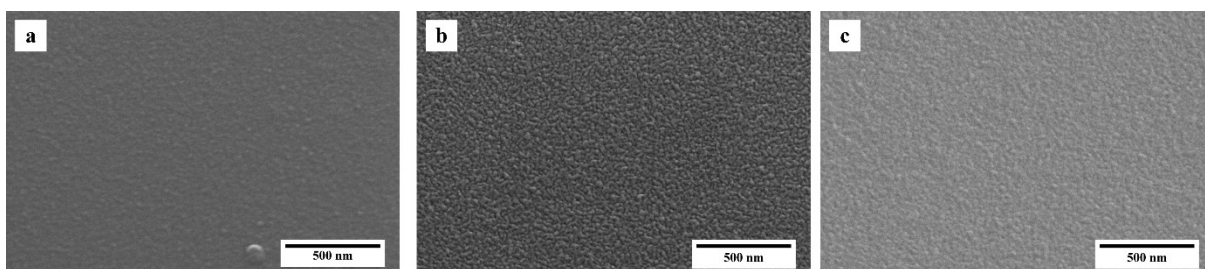

**Fig. S22:** SEM of **4\_Si** at 300 °C (a), 400 °C (b) and 500 °C (c).

Full scale counts: 3944  
Integral Counts: 61910

CSR009-Al2O3-B1(1)

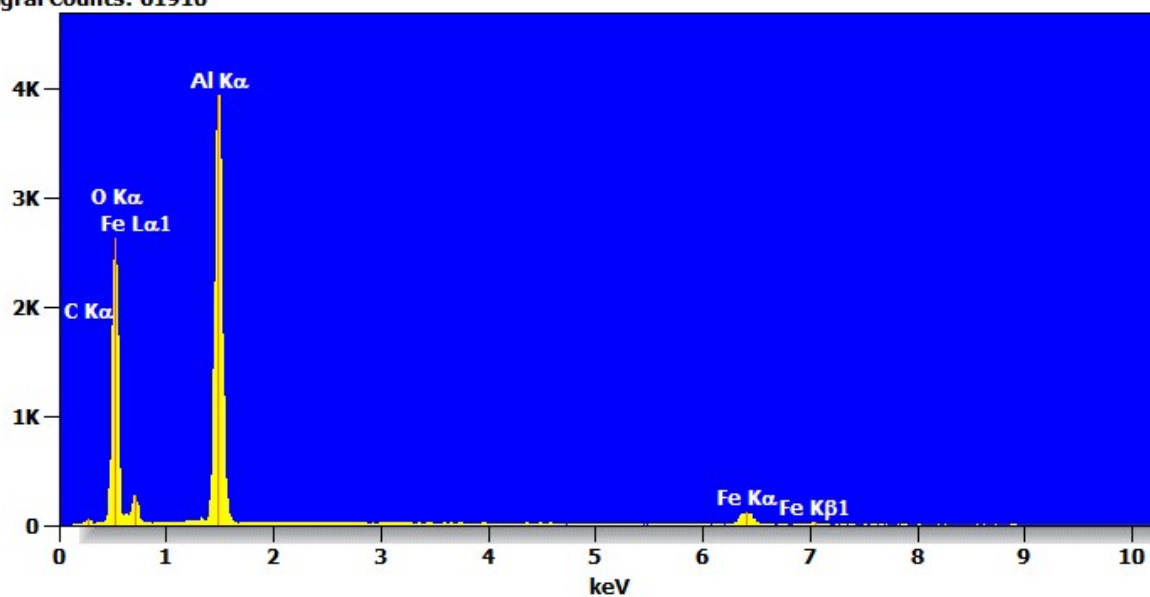

Fig. S23: EDX spectrum of 1\_Al.

Full scale counts: 11796  
Integral Counts: 177221

CSR010-Al2O3-B1(1)

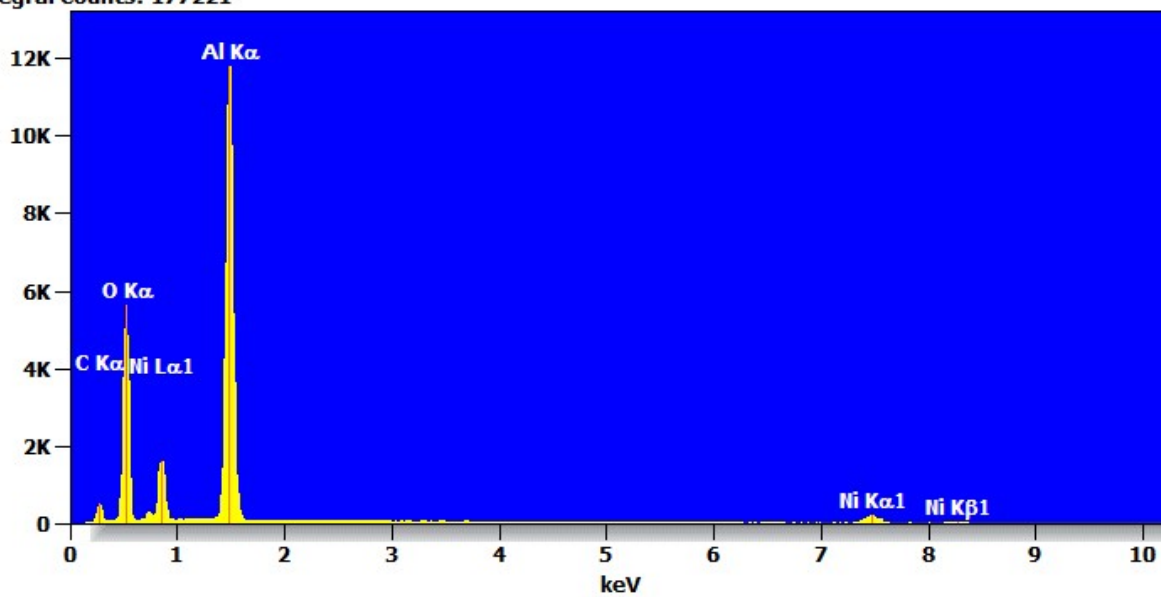

Fig. S24: EDX spectrum of 2\_Al.



Full scale counts: 9540  
Integral Counts: 167551

CSR011-Al2O3-B1(1)

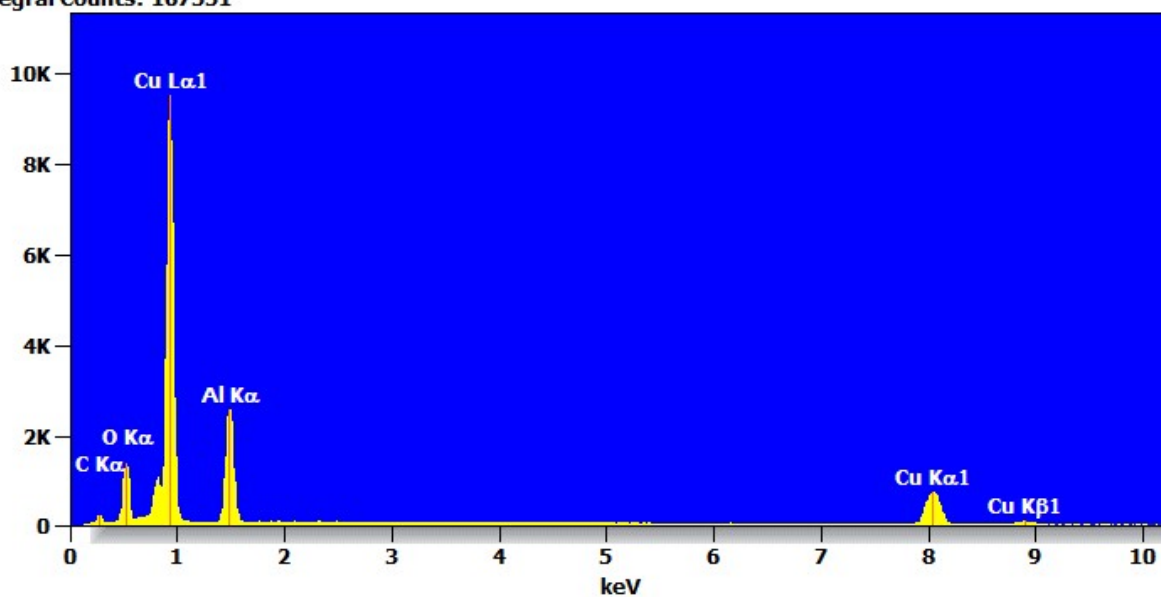

Fig. S25: EDX spectrum of 3\_Al.

Full scale counts: 10405  
Integral Counts: 175092

CSR012-Al2O3-B1(1)

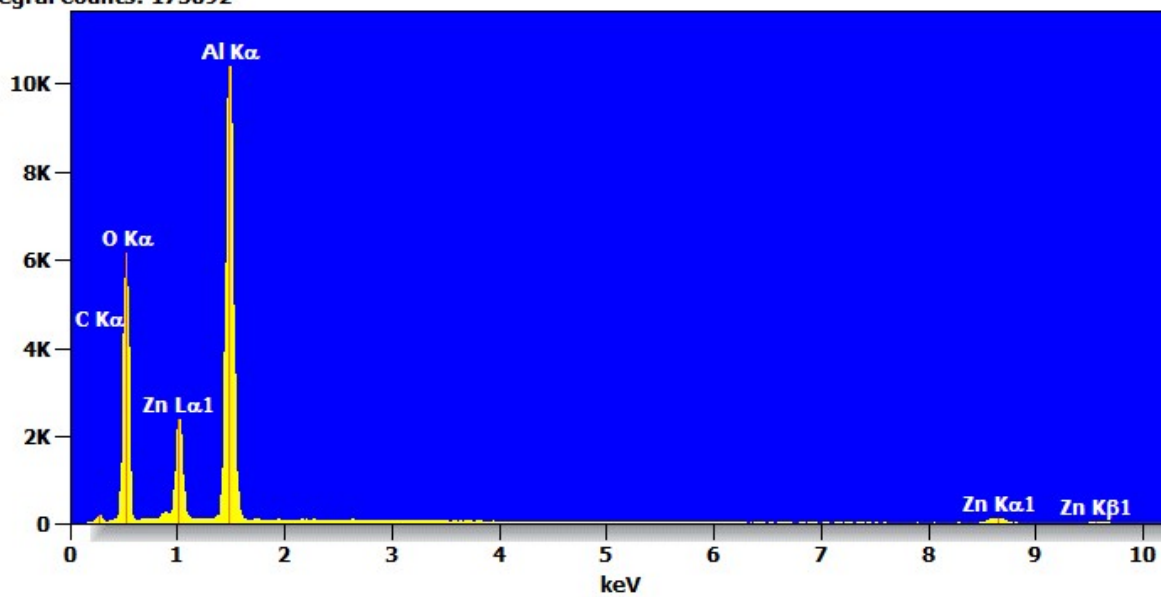

Fig. S26: EDX spectrum of 4\_Al.

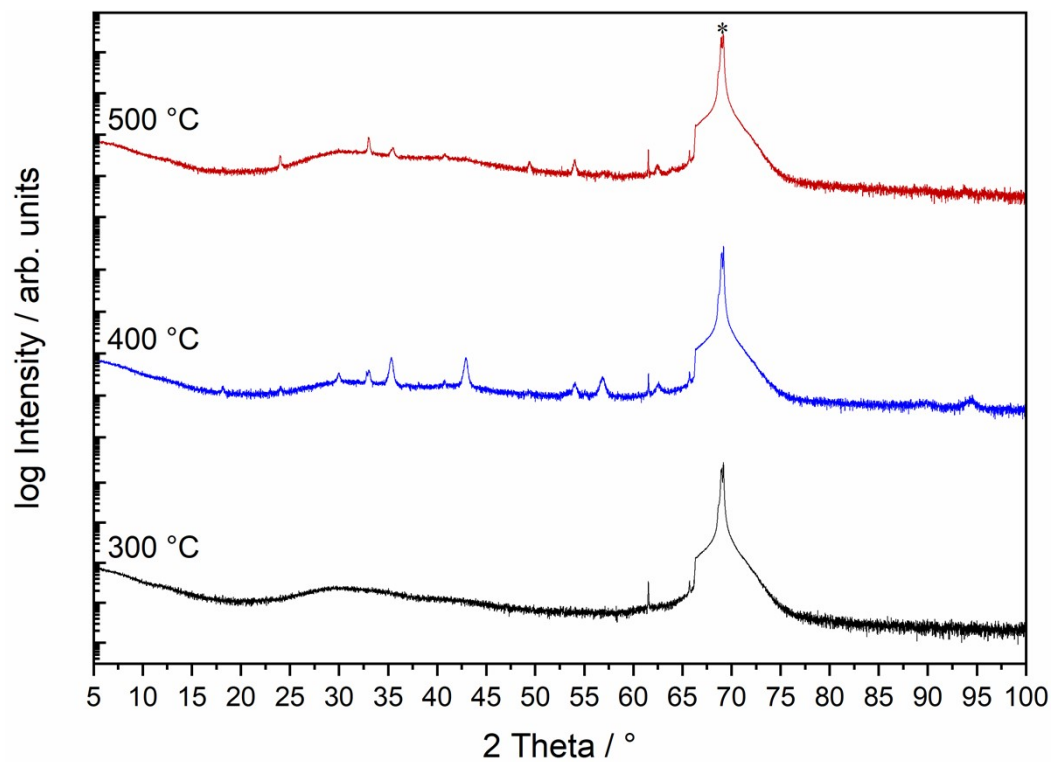

Fig. S27: XRD of 1\_Si.

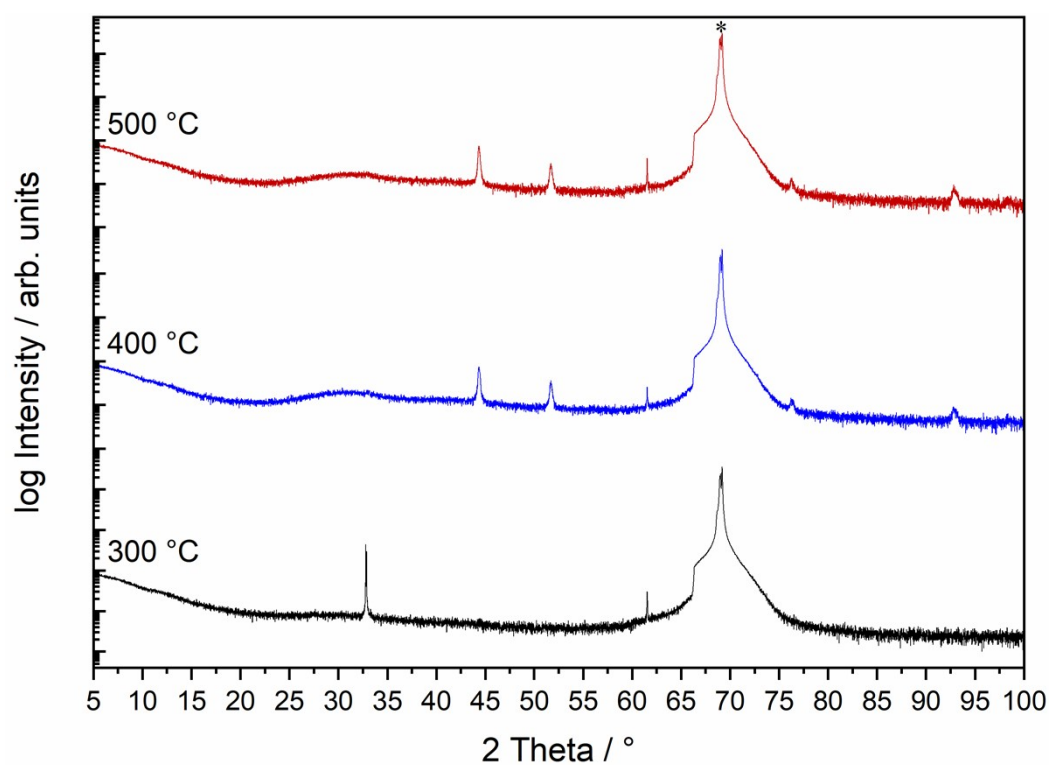

Fig. S28: XRD of 2\_Si.

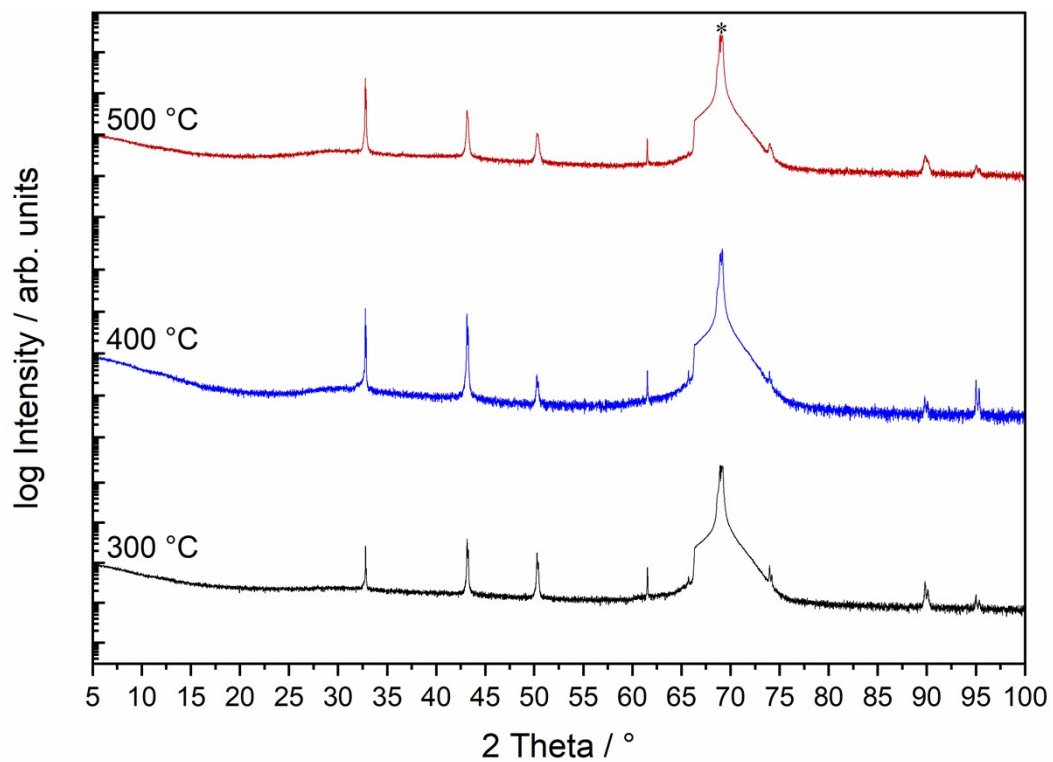

Fig. S29: XRD of 3\_Si.

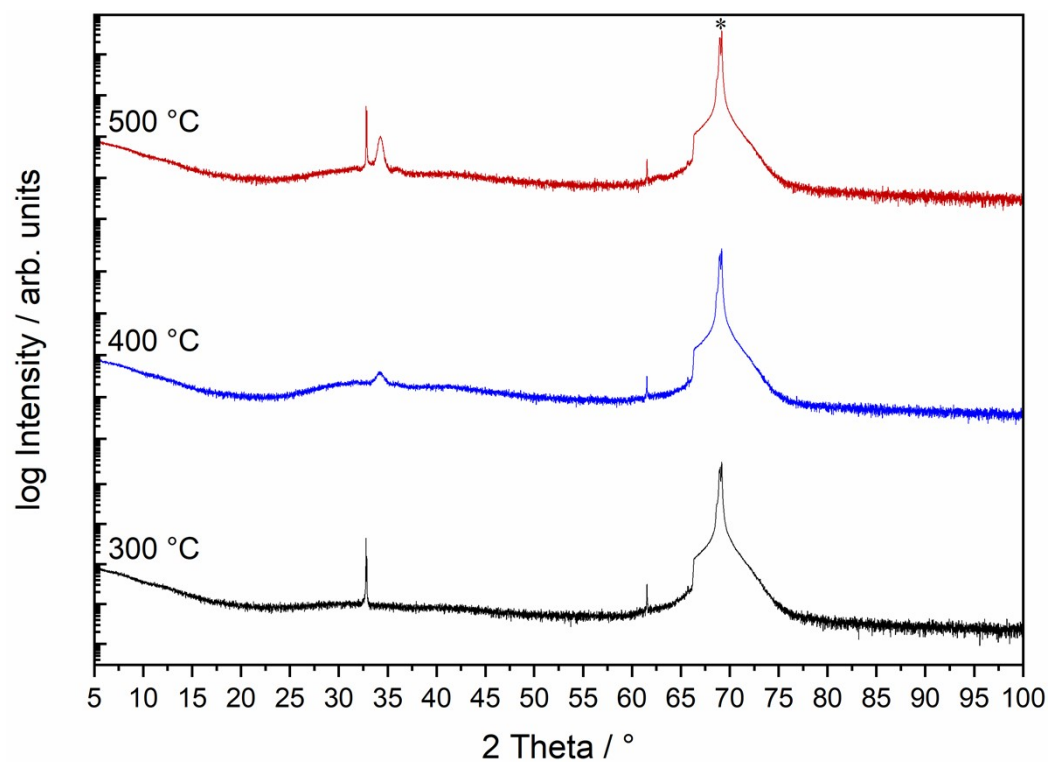

Fig. S30: XRD of 4\_Si.

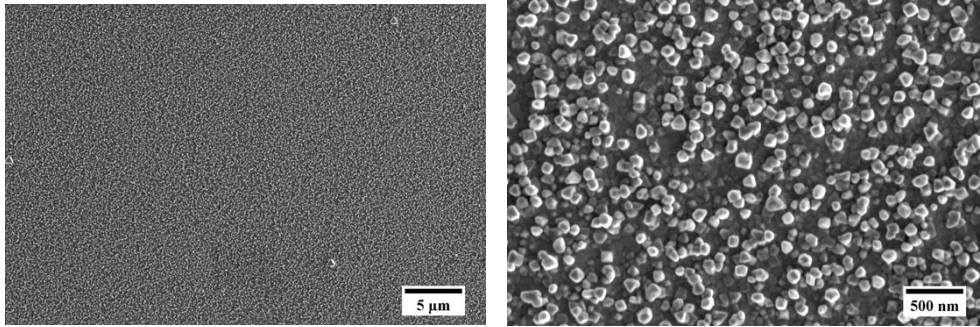

**Fig. S31:** SEM image of **1\_Al**.

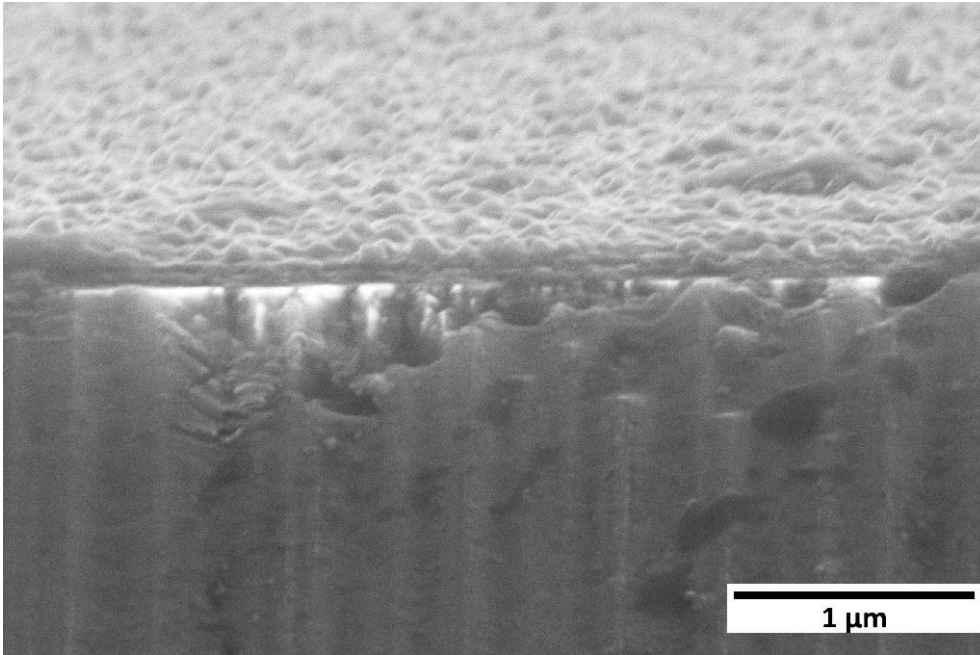

**Fig. S32:** Cross section SEM image of **1\_Al**.

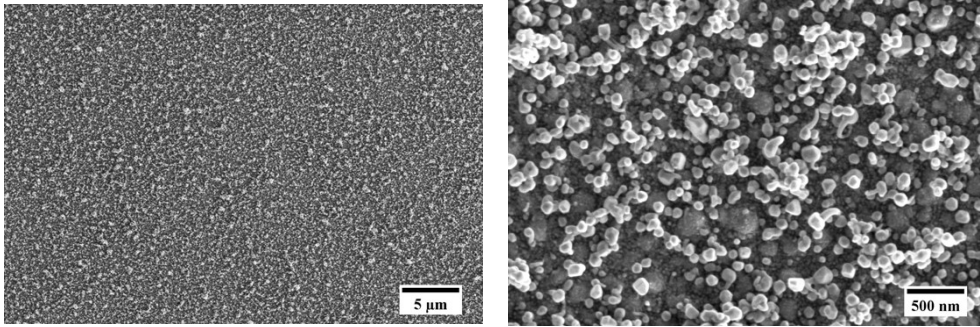

**Fig. S33:** SEM image of **2\_Al**.

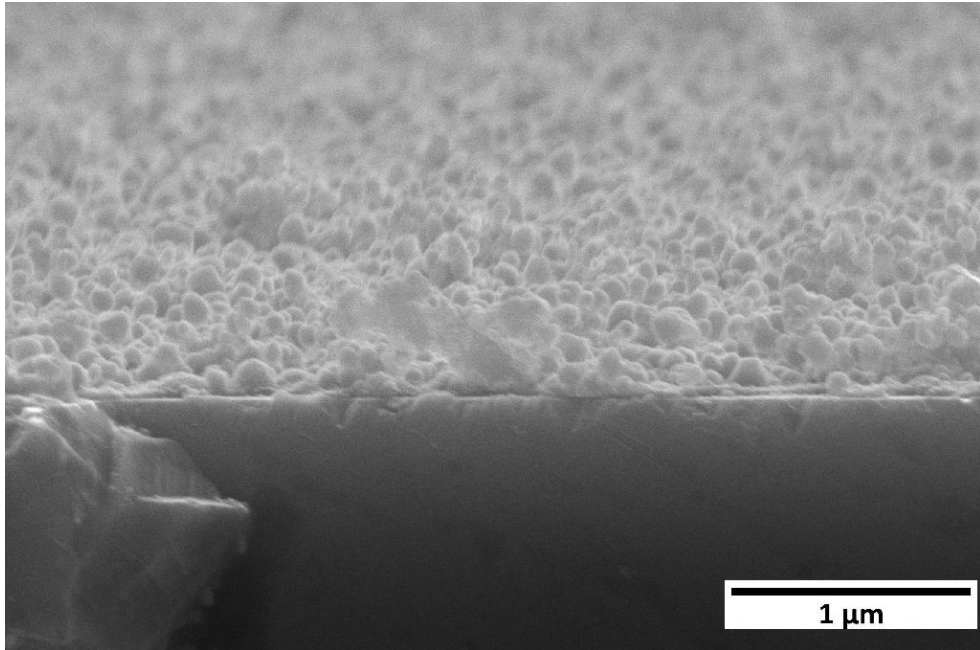

**Fig. S34:** Cross section SEM image of **2\_Al**.

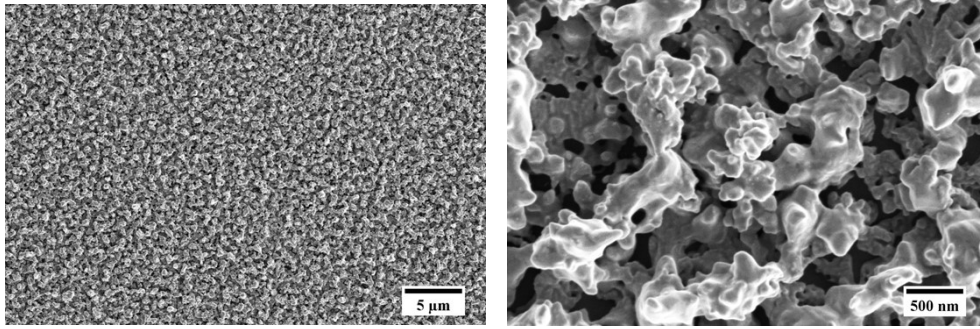

**Fig. S35:** SEM image of **3\_Al**.

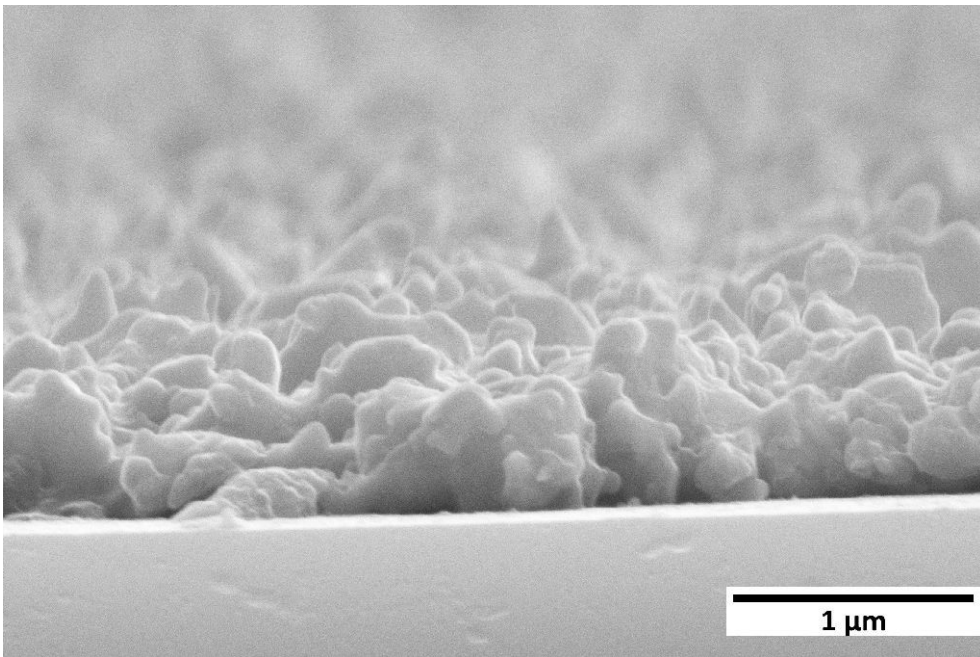

**Fig. S36:** Cross section SEM image of **3\_Al**.

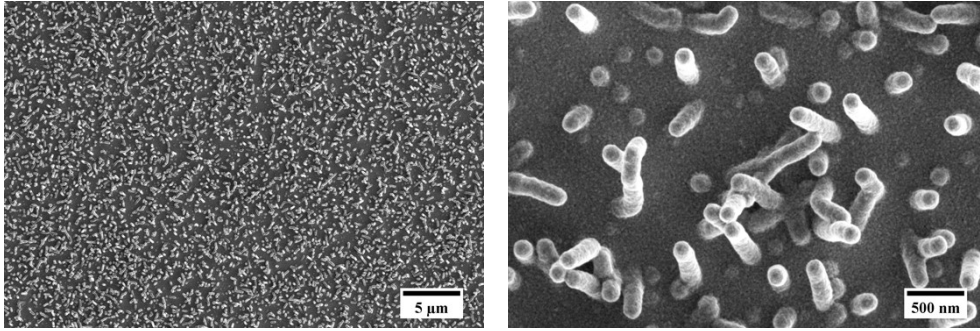

**Fig. S37:** SEM image of 4\_AI.

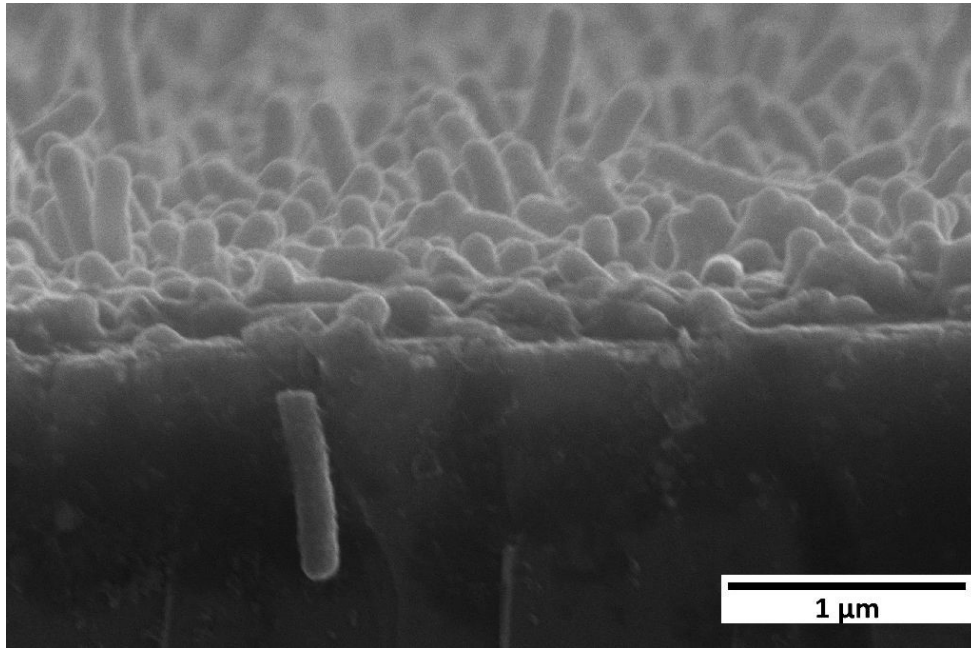

**Fig. S38:** Cross section SEM image of 4\_AI.

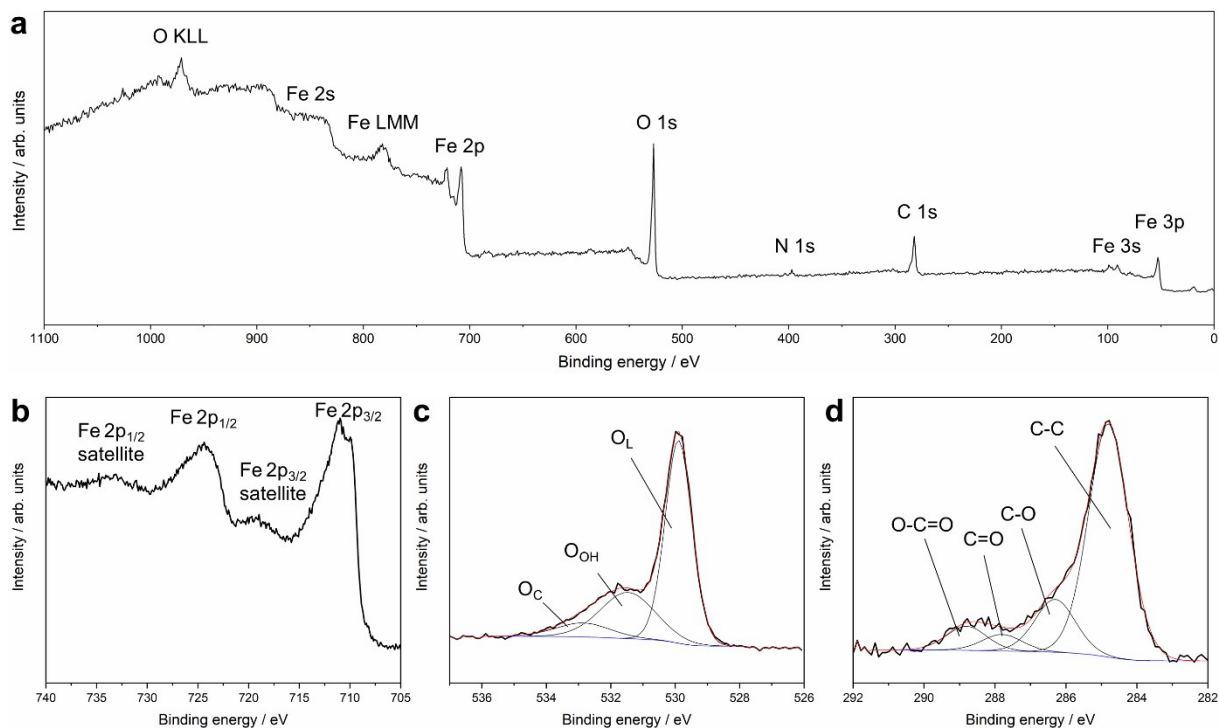

**Fig. S39:** XPS of 1\_AI. Survey (a), Fe 2p (b), O 1s (c) and C 1s (d).

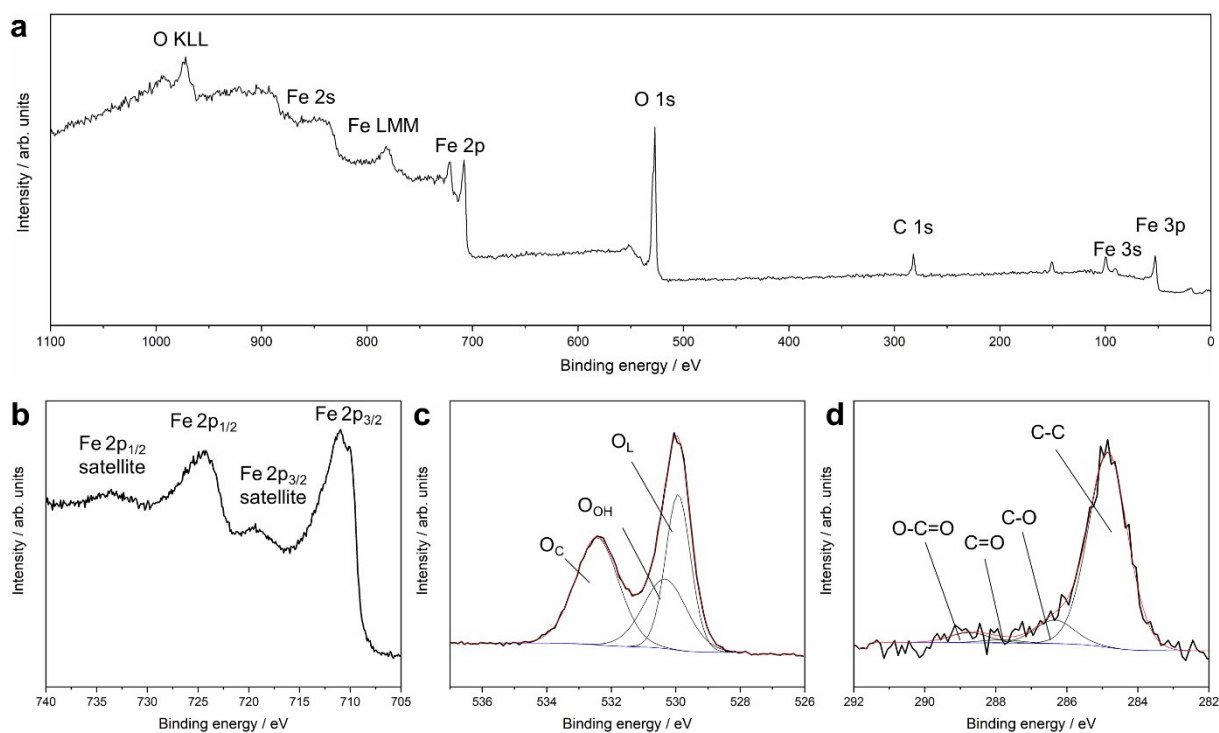

**Fig. S40:** XPS of 1\_AI after calcination. Survey (a), Fe 2p (b), O 1s (c) and C 1s (d).



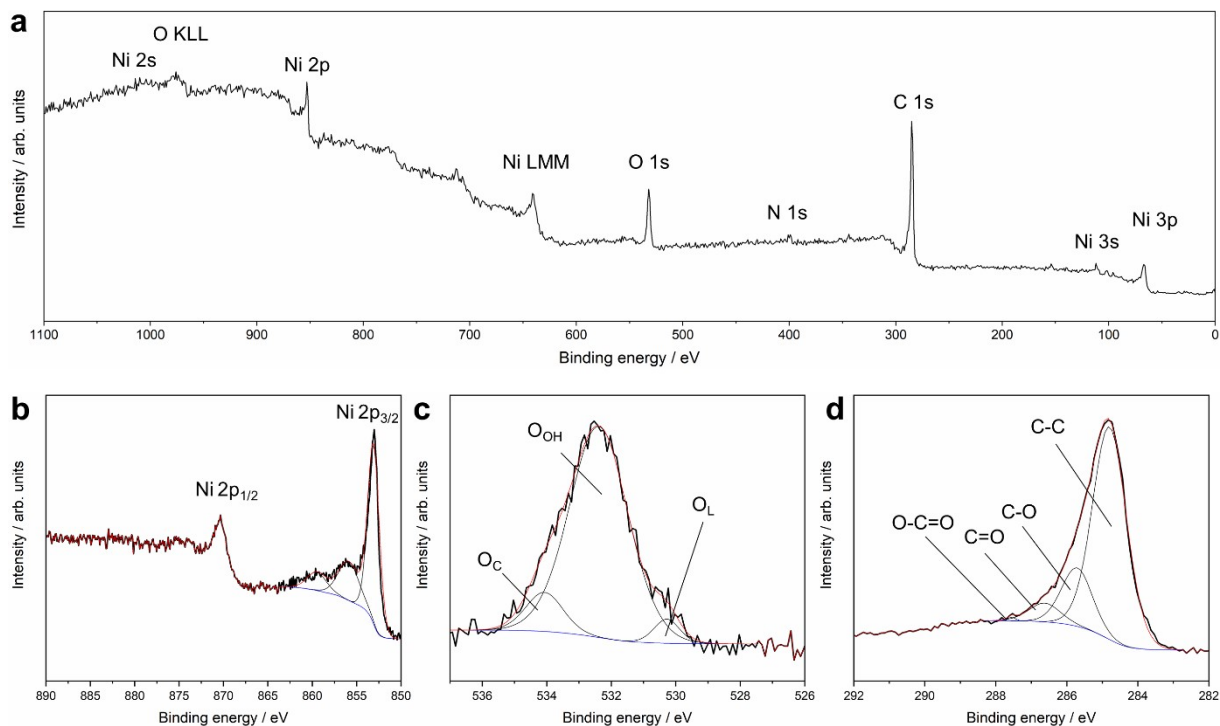

**Fig. S41:** XPS of **2\_AI**. Survey (a), Ni 2p (b), O 1s (c) and C 1s (d).

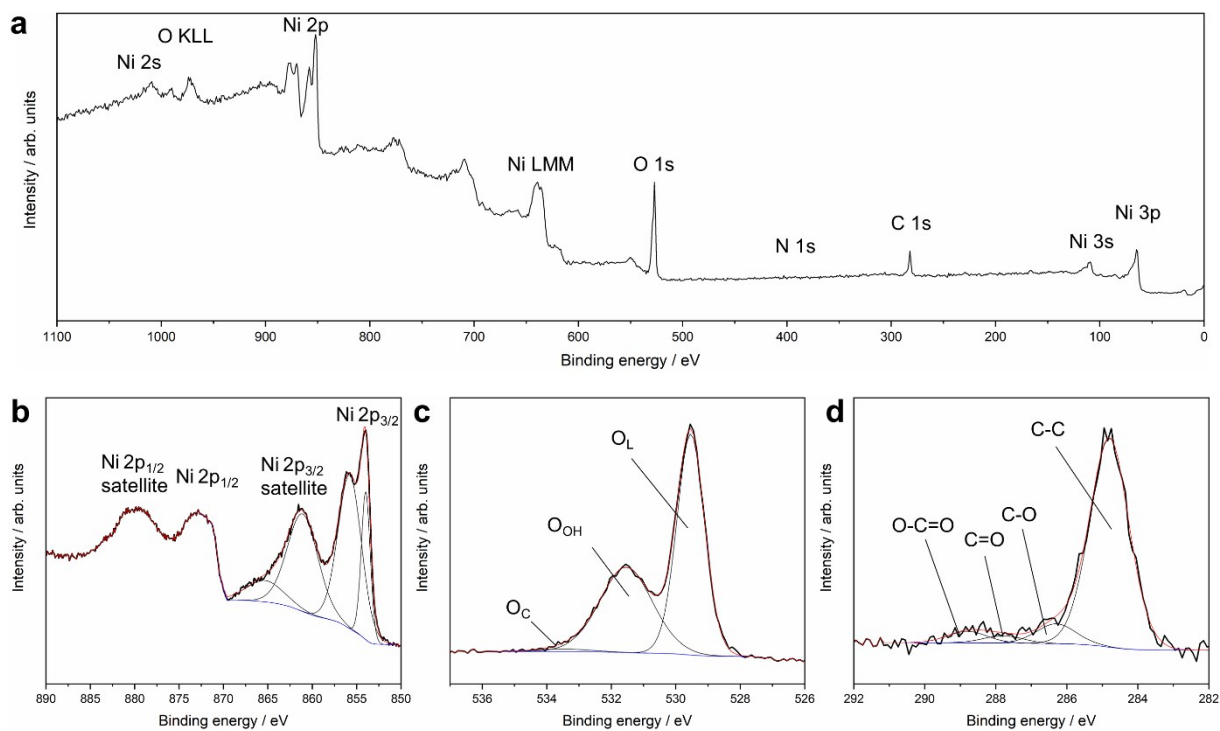

**Fig. S42:** XPS of **2\_AI** after calcination. Survey (a), Ni 2p (b), O 1s (c) and C 1s (d).

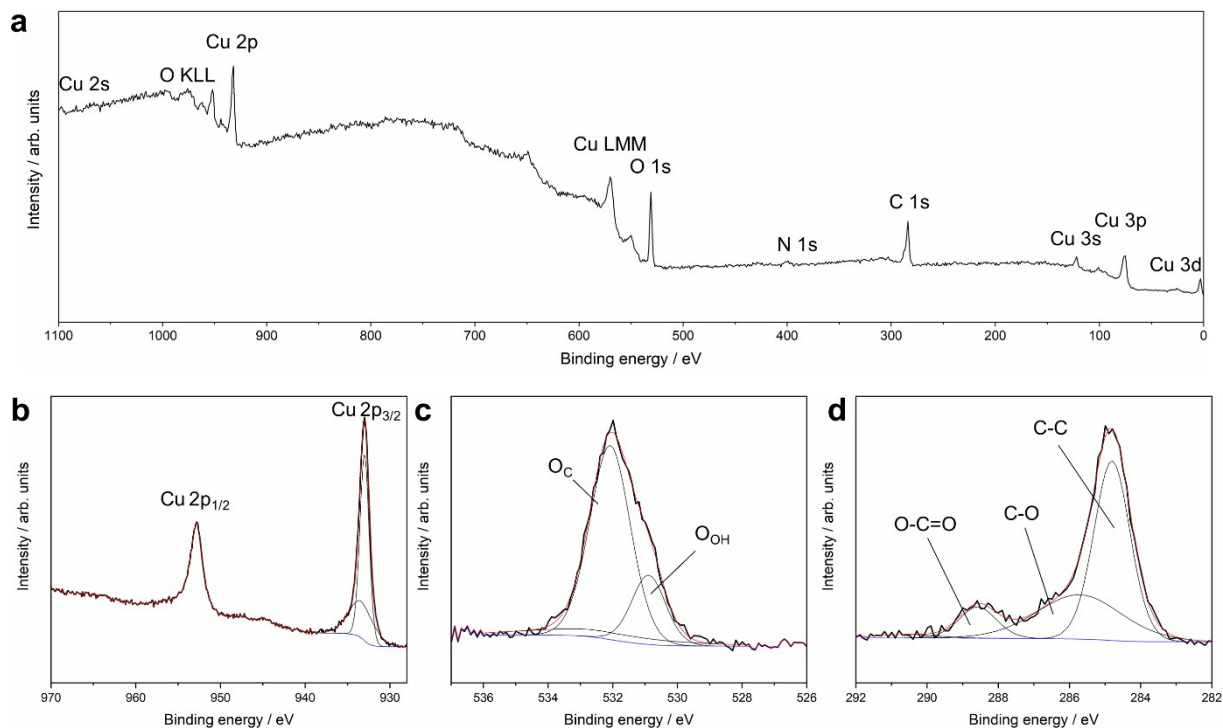

**Fig. S43:** XPS of **3\_AI**. Survey (a), Cu 2p (b), O 1s (c) and C 1s (d).

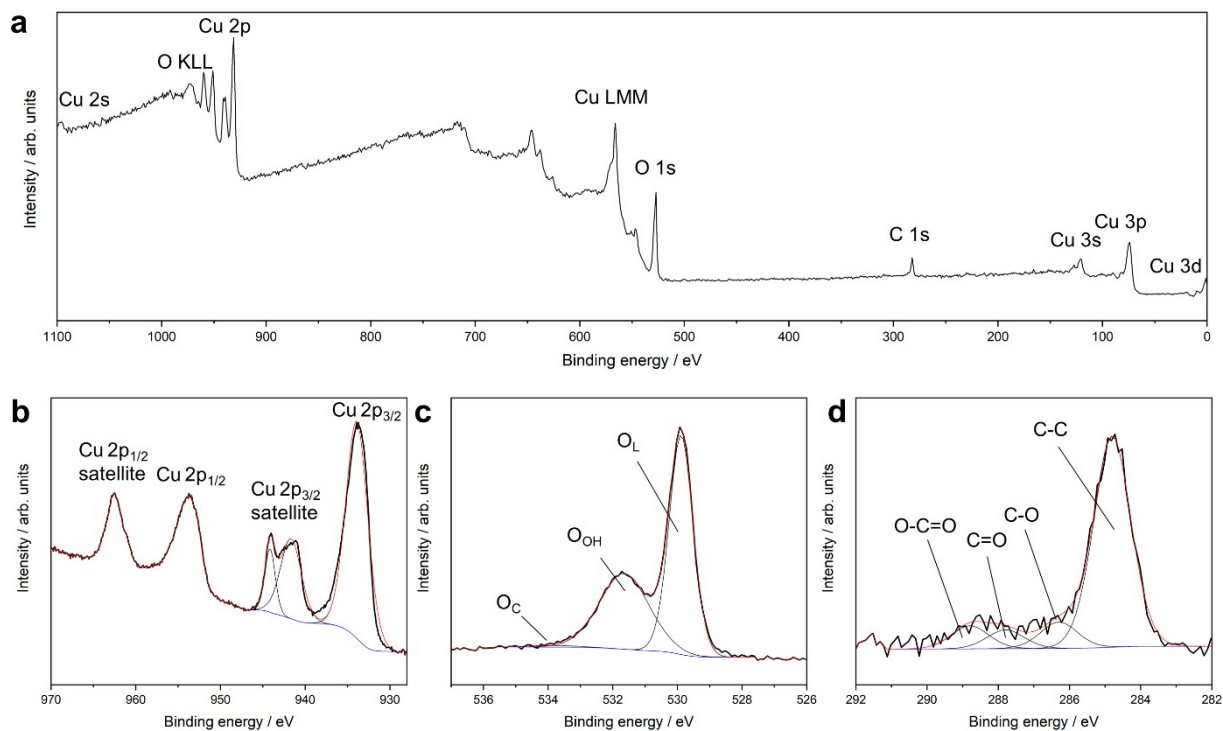

**Fig. S44:** XPS of **3\_AI** after calcination. Survey (a), Cu 2p (b), O 1s (c) and C 1s (d).

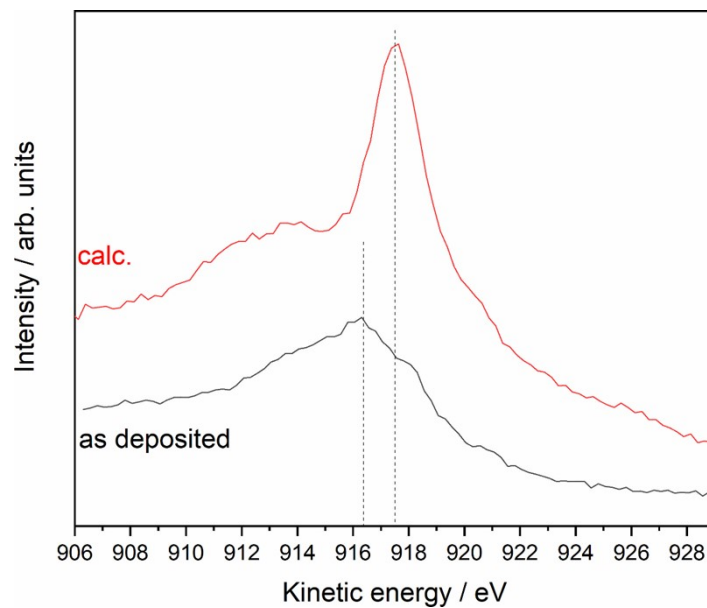

**Fig. S45:** Cu LMM spectra of **3\_AI** before and after calcination.

**Tab. S7:** Calculation of the mod. Auger parameter for **3\_AI**

|                  | Cu 2p <sub>3/2</sub> (eV) | Zn LMM (eV) | Mod. Auger parameter (eV) | Mod. Auger parameter (eV) Reference <sup>[2]</sup> |
|------------------|---------------------------|-------------|---------------------------|----------------------------------------------------|
| <b>3_AI</b>      | 933.0                     | 916.4       | 1849.4                    | 1849.2 (Cu <sub>2</sub> O)                         |
| <b>3_AI_calc</b> | 933.7                     | 917.6       | 1851.3                    | 1851.3 (CuO)                                       |

[2] M. C. Biesinger, Surf. Interface Anal., 2017, 49, 1325–1334.

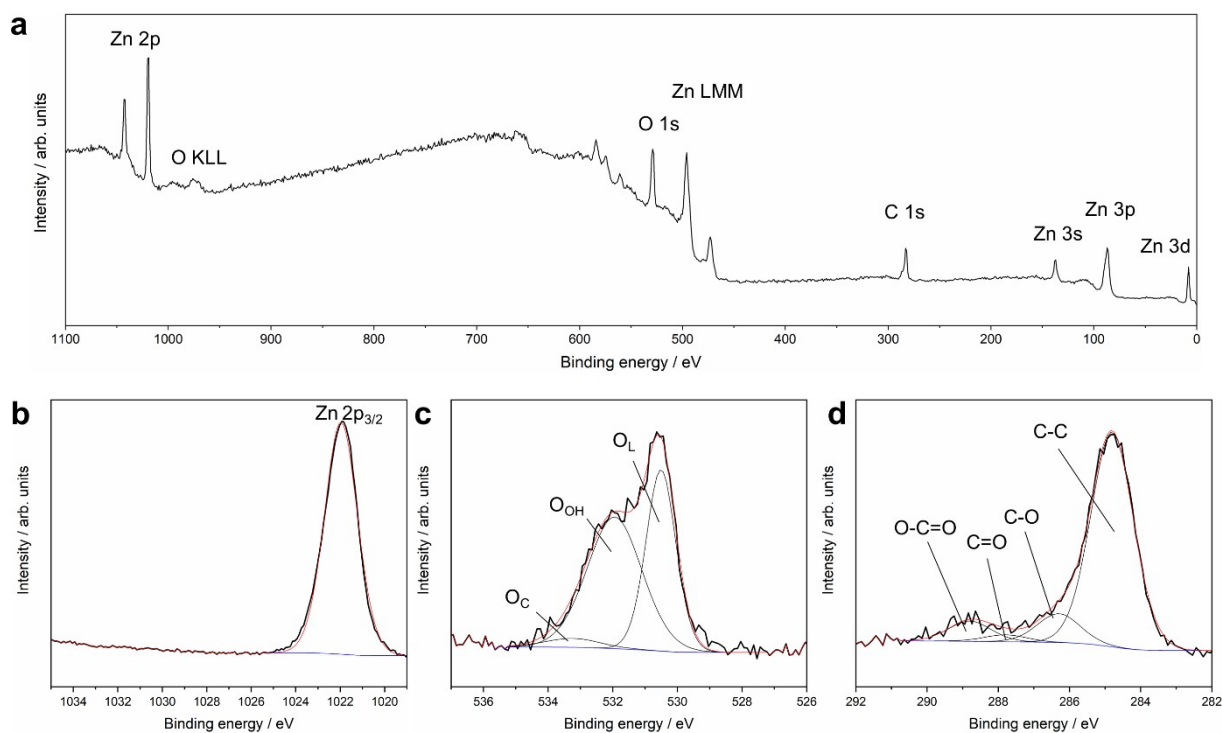

**Fig. S46:** XPS of **4\_AI**. Survey (a), Zn 2p (b), O 1s (c) and C 1s (d).

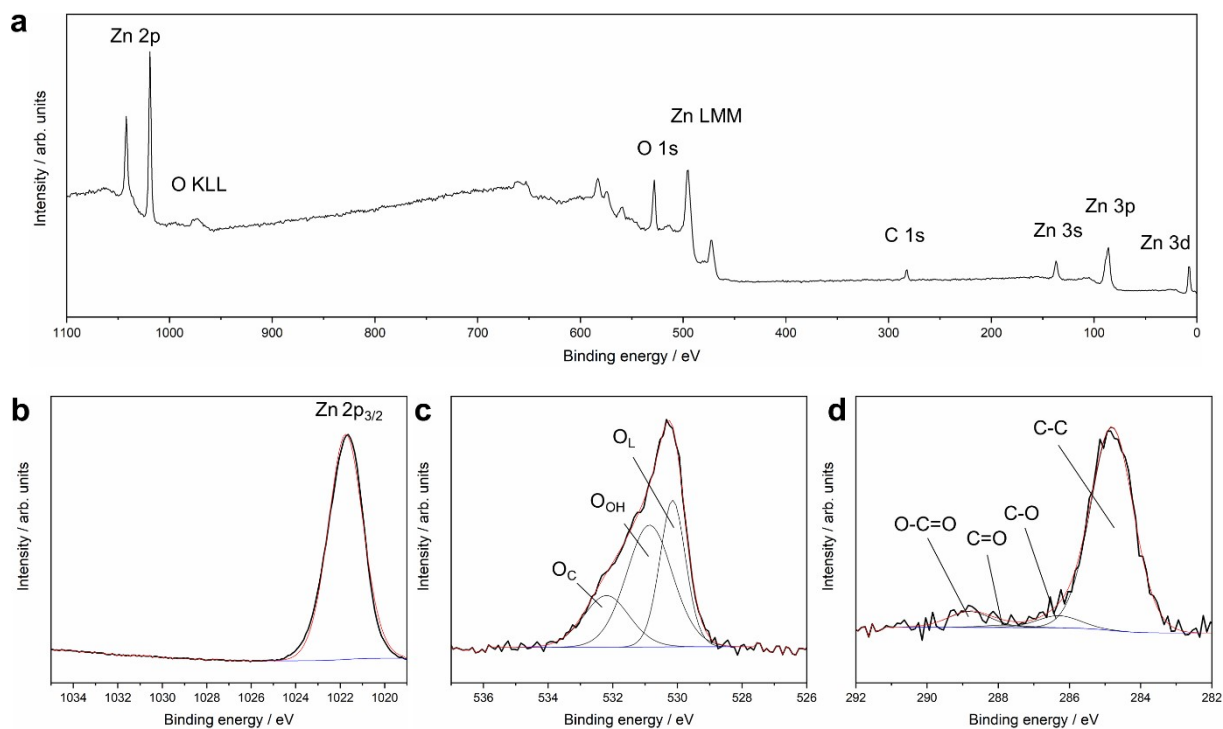

**Fig. S47:** XPS of **4\_AI** after calcination. Survey (a), Zn 2p (b), O 1s (c) and C 1s (d).

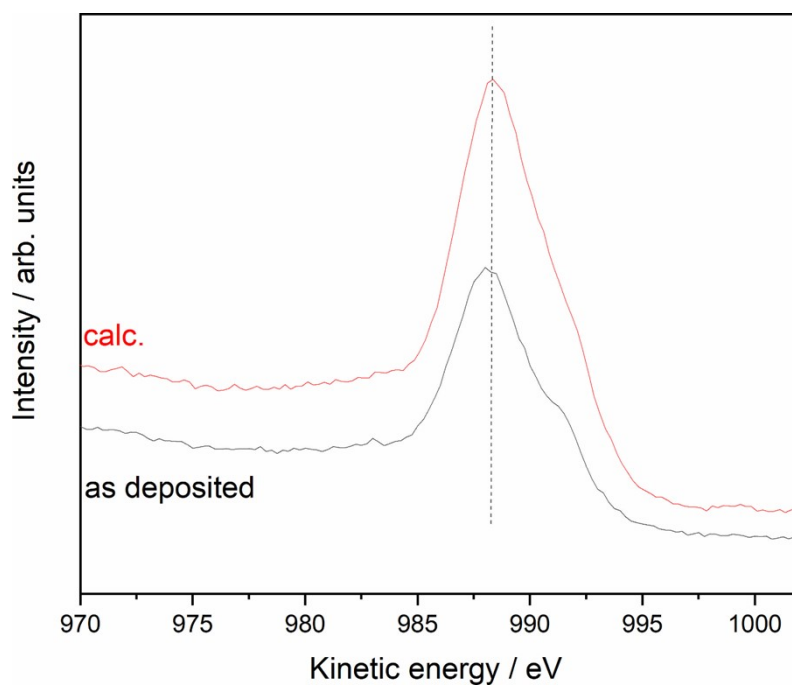

**Fig. S48:** Zn LMM spectra of **4\_AI** before and after calcination.

**Tab. S8:** Calculation of the mod. Auger parameter for **3\_AI**

|                  | Zn 2p <sub>3/2</sub> (eV) | Zn LMM (eV) | Mod. Auger parameter (eV) | Mod. Auger parameter (eV) Reference <sup>[3]</sup> |
|------------------|---------------------------|-------------|---------------------------|----------------------------------------------------|
| <b>4_AI</b>      | 1021.9                    | 988.0       | 2009.9                    | 2010.4 (ZnO)                                       |
| <b>4_AI_calc</b> | 1021.7                    | 988.3       | 2010.0                    | 2010.4 (ZnO)                                       |

[3] M. C. Biesinger, L. W. M. Lau, A. R. Gerson, R. S. C. Smart, *Appl. Surf. Sci.* **2010**, 257, 887–898.
